# Supplementary material for: ApoC-III is a novel inducer of calcification in human aortic valves
Source: J Biol Chem. 2021 Jan 6;296:100193. doi: 10.1074/jbc.RA120.015700 (PMC7948477; doi:10.1074/jbc.RA120.015700)
Supplement: JBC_JBC/2020/015700_8 [file mmc2.pdf]

## ApoC-III is a novel inducer of calcification in human aortic valves

Florian Schlotter, MD\*<sup>1</sup>, Renata C. C. de Freitas, MSc\*<sup>1</sup>, Maximillian A. Rogers, PhD<sup>1</sup>, Mark C. Blaser, PhD<sup>1</sup>, Pin-Jou Wu, MS<sup>1</sup>, Hideyuki Higashi, MS<sup>1</sup>, Arda Halu, PhD<sup>1,2</sup>, Farwah Iqbal, PhD<sup>3</sup>, Allison B. Andraski, PhD<sup>4</sup>, Cayla N. Rodia, PhD<sup>5</sup>, Shiori Kuraoka, MSc<sup>1</sup>, Jennifer R. Wen, BS<sup>1</sup>, Michael Creager, BS<sup>1</sup>, Tan Pham, BS<sup>1</sup>, Joshua D. Hutcheson, PhD<sup>6</sup>, Simon C. Body, MD, MPH<sup>7</sup>, Alison B. Kohan, PhD<sup>8</sup>, Frank M. Sacks, MD<sup>4</sup>, Masanori Aikawa, MD, PhD<sup>1,3</sup>, Sasha A. Singh, PhD<sup>1</sup>, Elena Aikawa, MD, PhD<sup>1,3,9</sup>

<sup>1</sup> Center for Interdisciplinary Cardiovascular Sciences, Division of Cardiovascular Medicine, Department of Medicine, Brigham and Women's Hospital, Harvard Medical School, Boston, MA, USA

<sup>2</sup> Channing Division of Network Medicine, Brigham and Women's Hospital, Harvard Medical School, Boston, MA, USA

<sup>3</sup> Center for Excellence in Vascular Biology, Division of Cardiovascular Medicine, Department of Medicine, Brigham and Women's Hospital, Harvard Medical School, Boston, MA, USA

<sup>4</sup> Department of Nutrition and Department of Molecular Metabolism, Harvard T.H. Chan School of Public Health, Boston, MA, USA

<sup>5</sup> Department of Nutritional Sciences, University of Connecticut, Storrs, CT, USA

<sup>6</sup> Department of Biomedical Engineering, Florida International University, Miami, FL, USA

<sup>7</sup> Department of Anesthesiology, Boston University School of Medicine, Boston, MA, USA

<sup>8</sup> Department of Medicine, Division of Endocrinology and Metabolism, University of Pittsburgh, PA, USA

<sup>9</sup> Department of Human Pathology, Sechenov First Moscow State Medical University, Moscow, Russia

Short title: Role of ApoC-III in calcific aortic valve disease

Corresponding author:

Elena Aikawa, M.D., PhD

Center for Interdisciplinary Cardiovascular Sciences

Brigham and Women's Hospital, Harvard Medical School

3 Blackfan St, 17th Floor

Boston, MA 02115

Phone: 617 730-7755

Email: [eaikawa@bwh.harvard.edu](mailto:eaikawa@bwh.harvard.edu)

Twitter handle: @CICSnews

Supporting Information 1

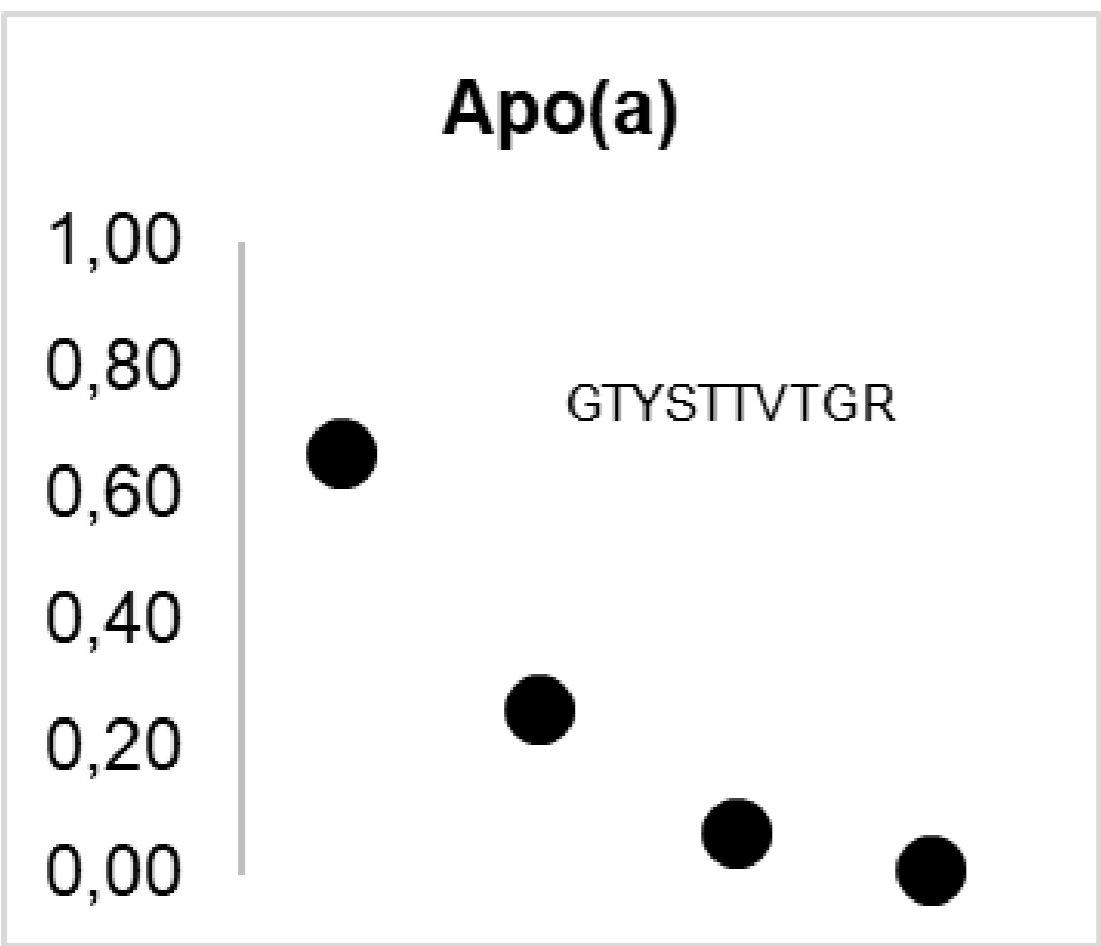

$\alpha 0$   $\alpha 1$   $\alpha 2$   $\alpha 3$

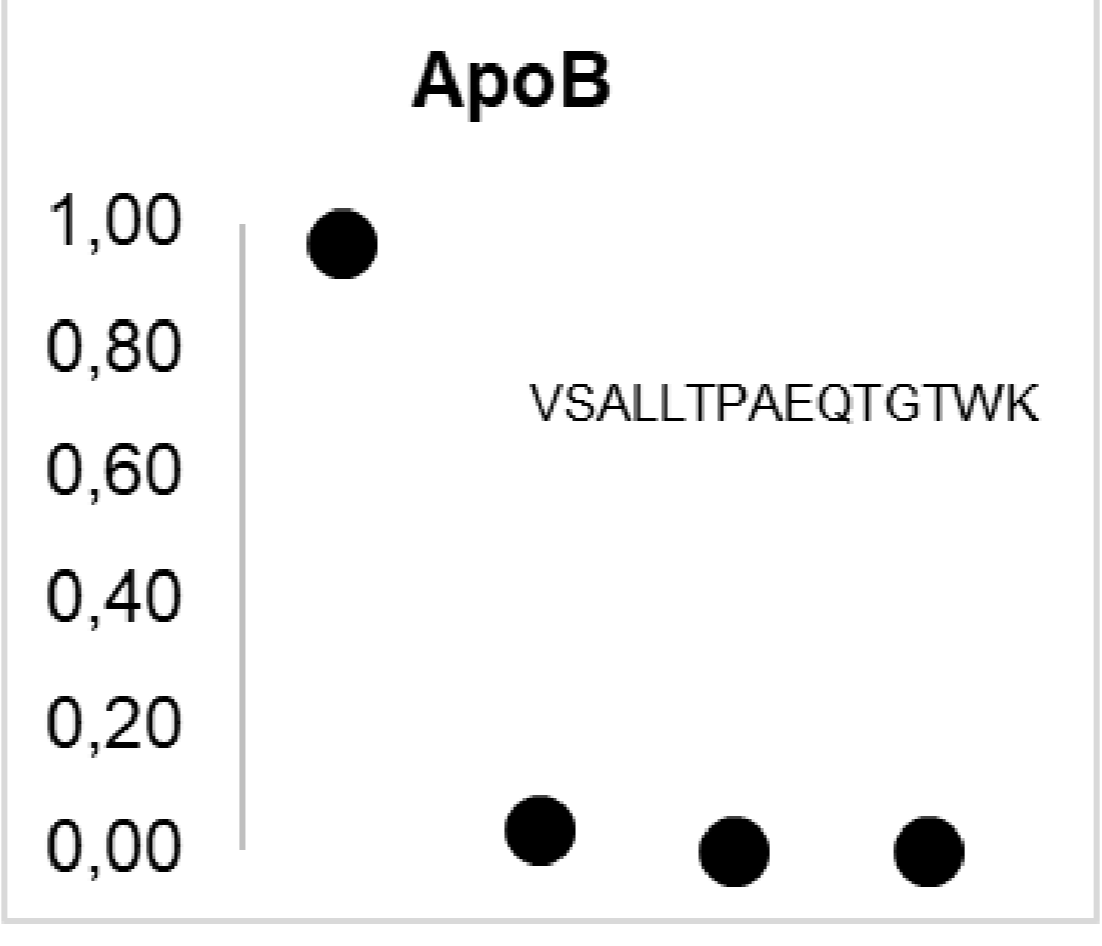

$\alpha 0$   $\alpha 1$   $\alpha 2$   $\alpha 3$

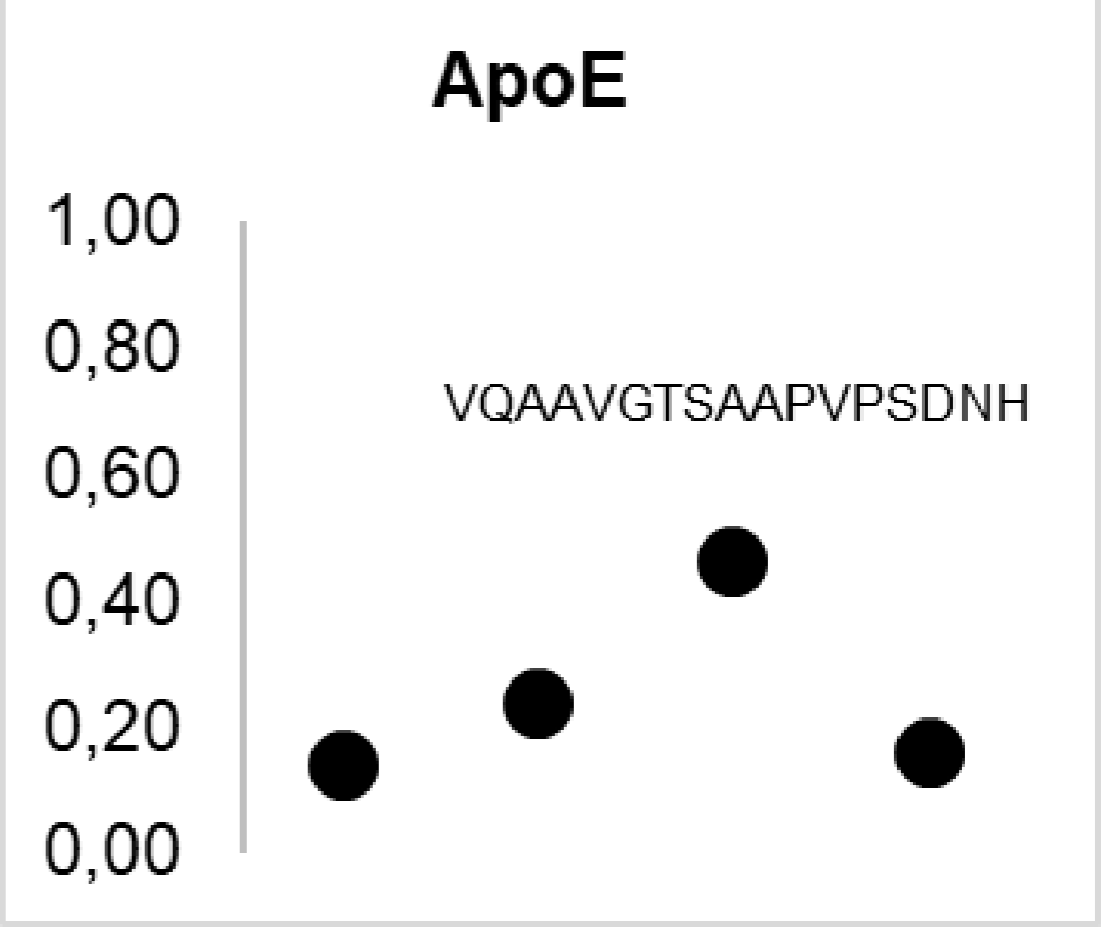

$\alpha 0$   $\alpha 1$   $\alpha 2$   $\alpha 3$

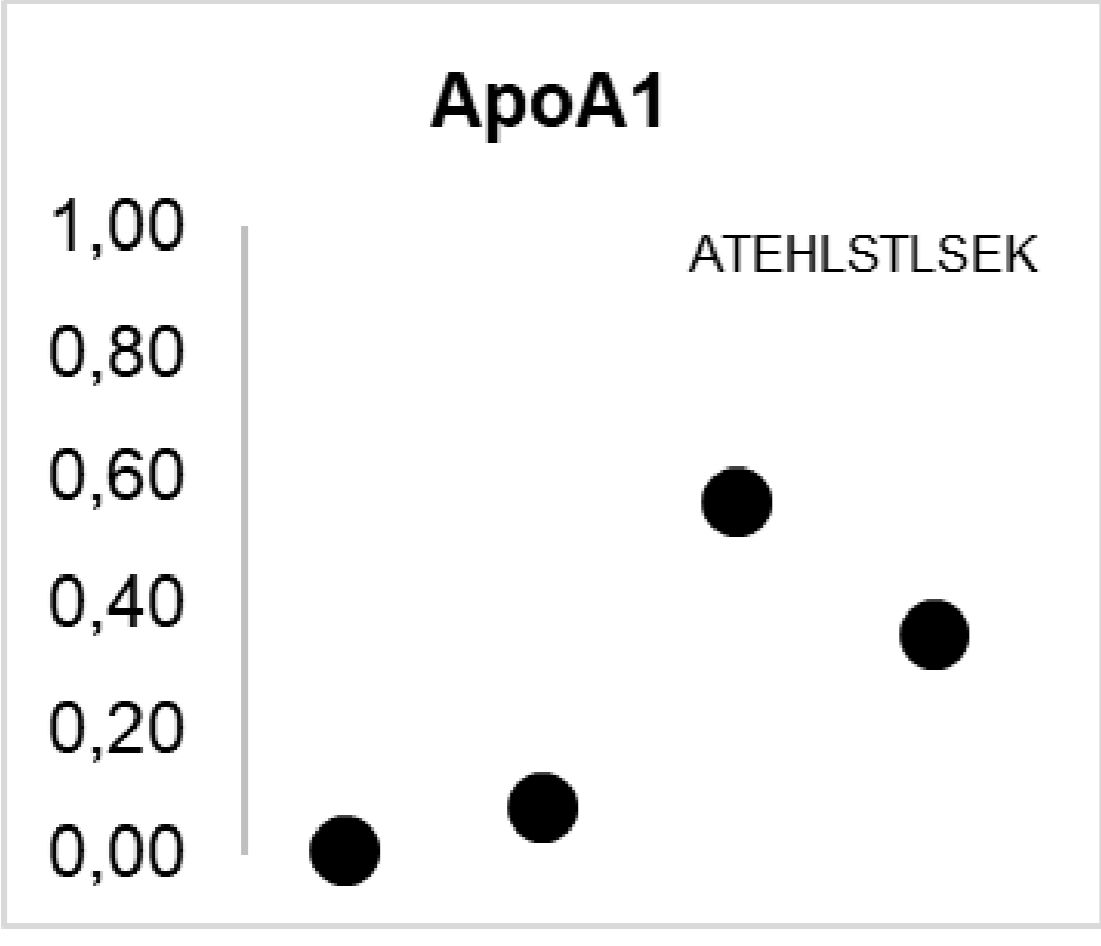

$\alpha 0$   $\alpha 1$   $\alpha 2$   $\alpha 3$

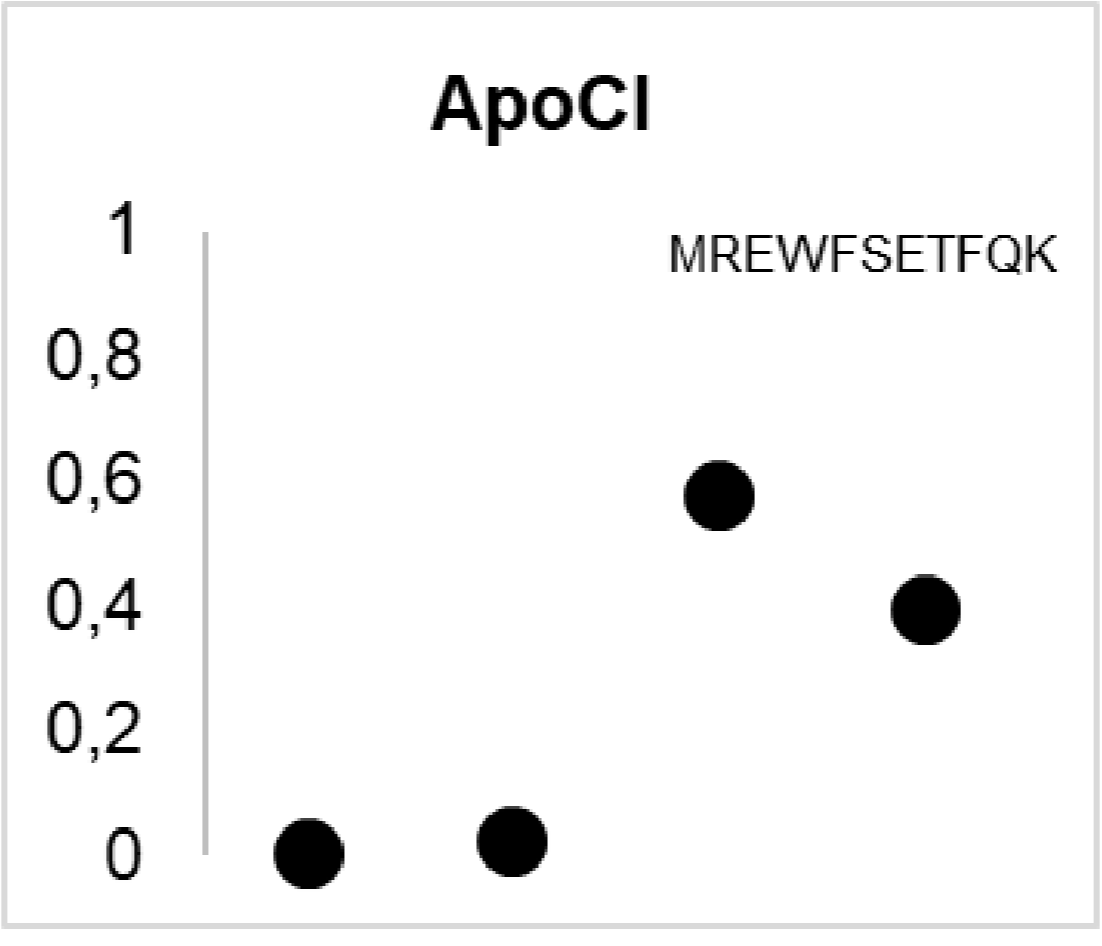

$\alpha 0$   $\alpha 1$   $\alpha 2$   $\alpha 3$

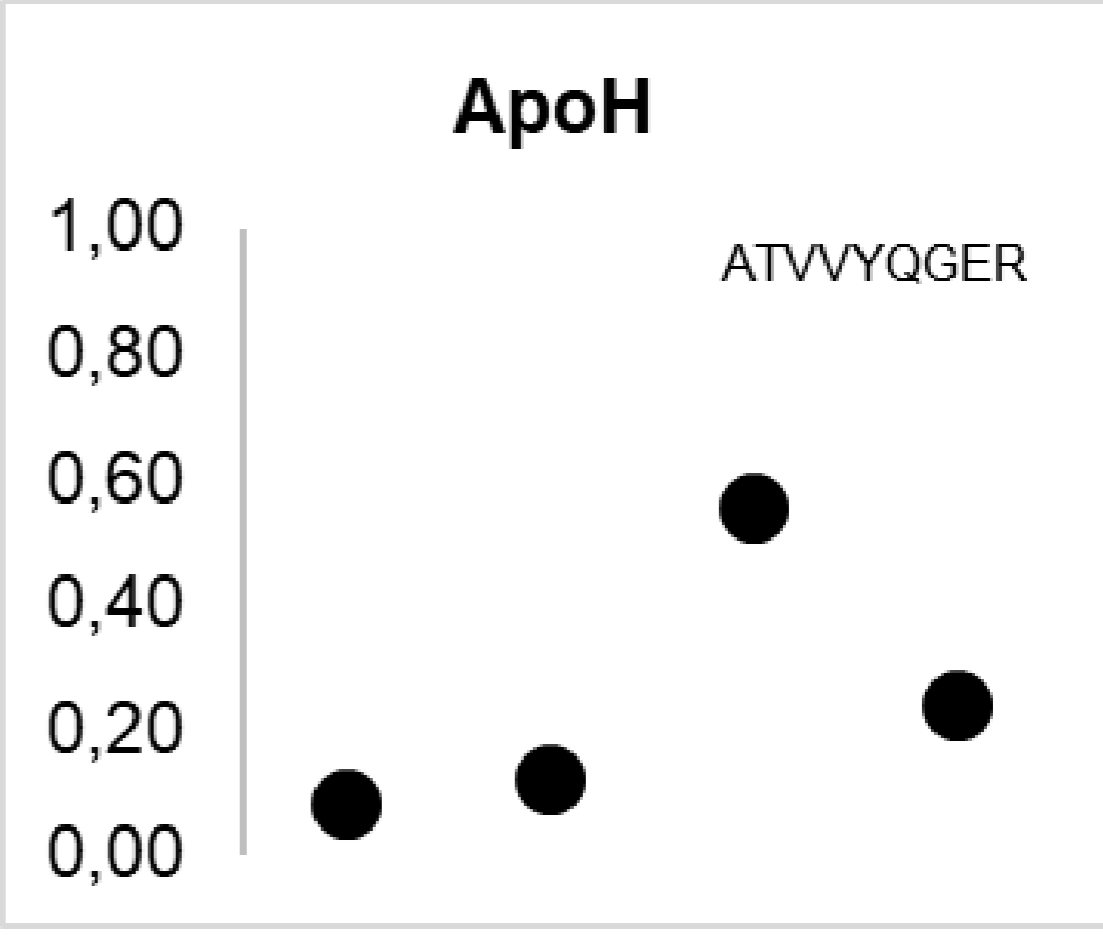

$\alpha 0$   $\alpha 1$   $\alpha 2$   $\alpha 3$

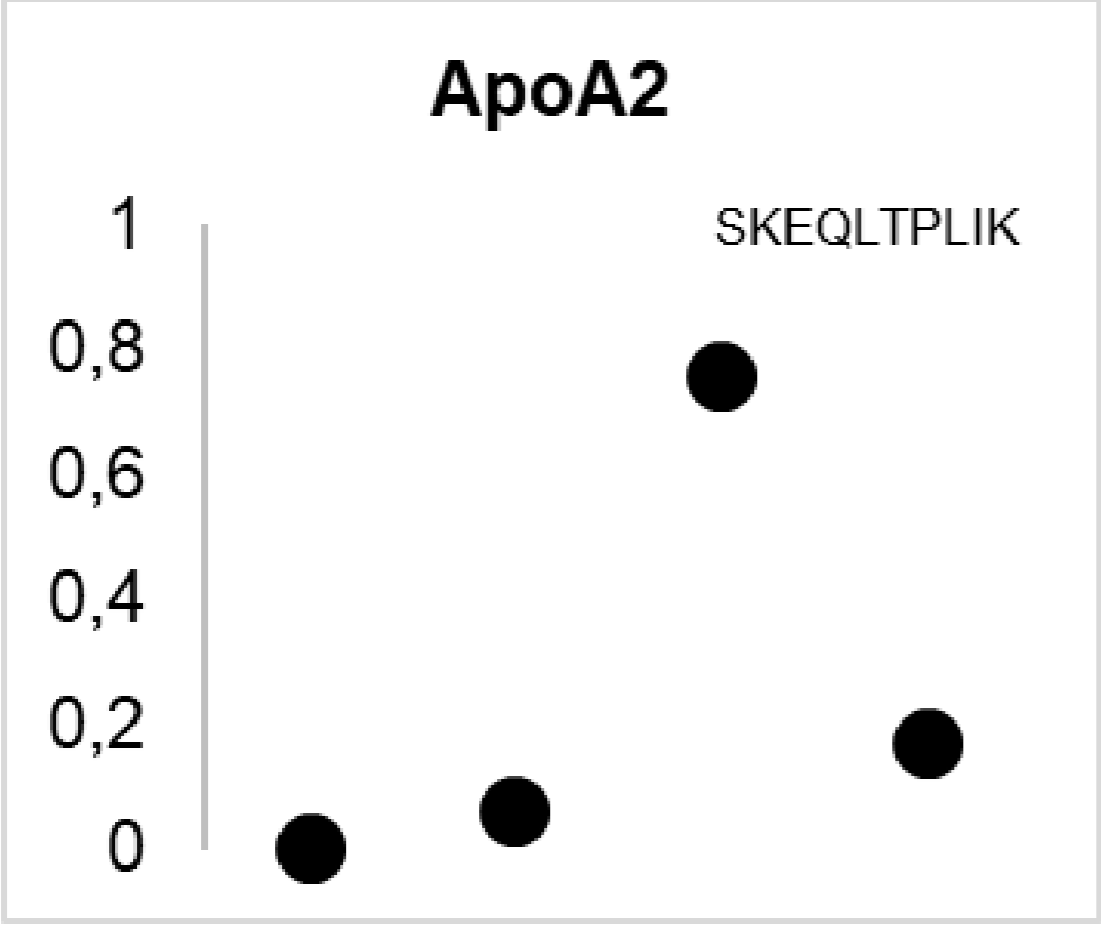

$\alpha 0$   $\alpha 1$   $\alpha 2$   $\alpha 3$

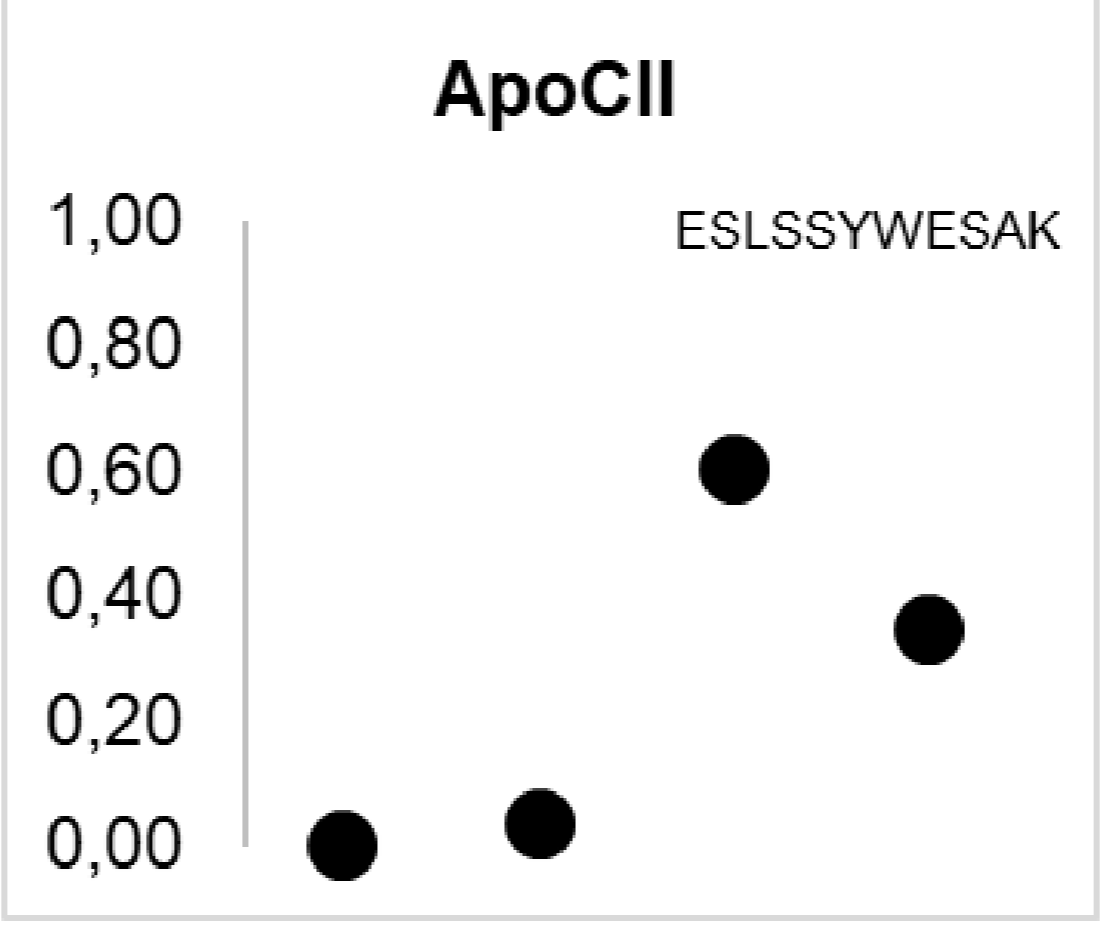

$\alpha 0$   $\alpha 1$   $\alpha 2$   $\alpha 3$

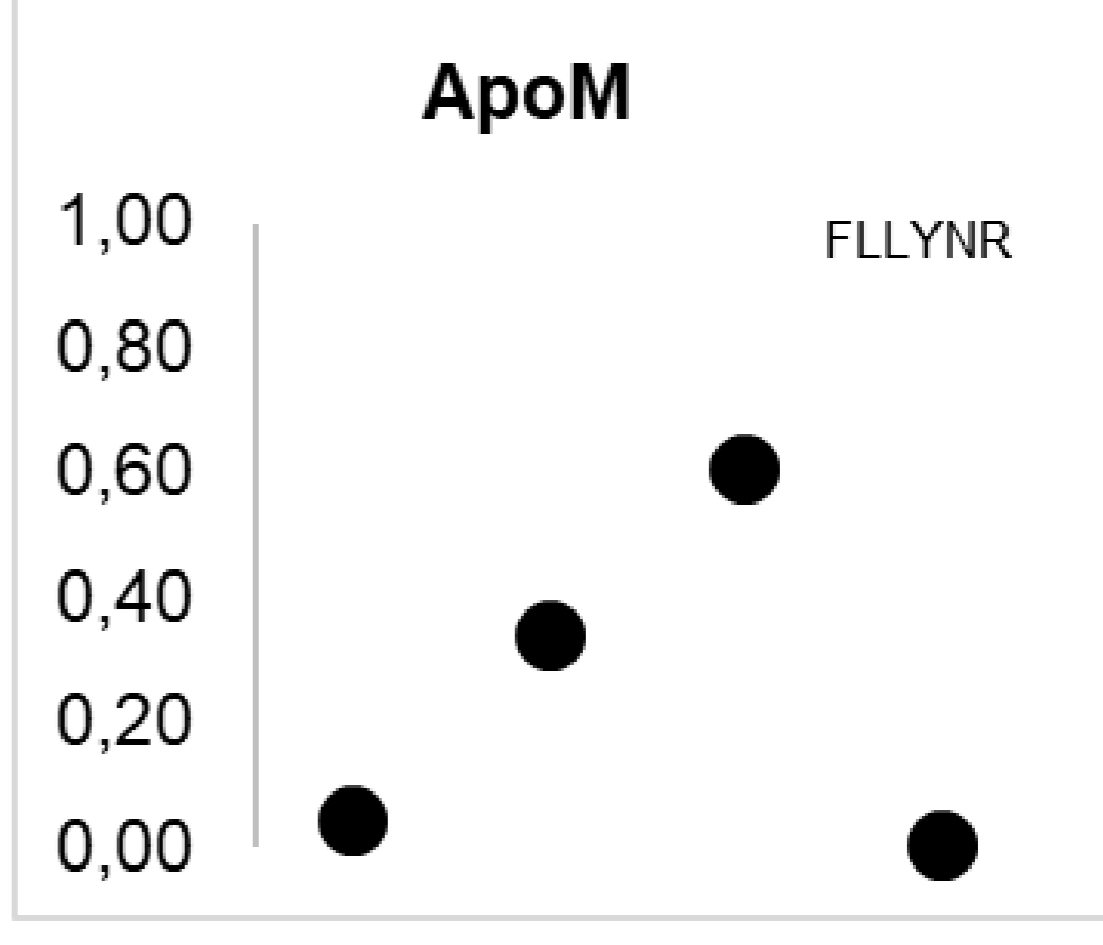

$\alpha 0$   $\alpha 1$   $\alpha 2$   $\alpha 3$

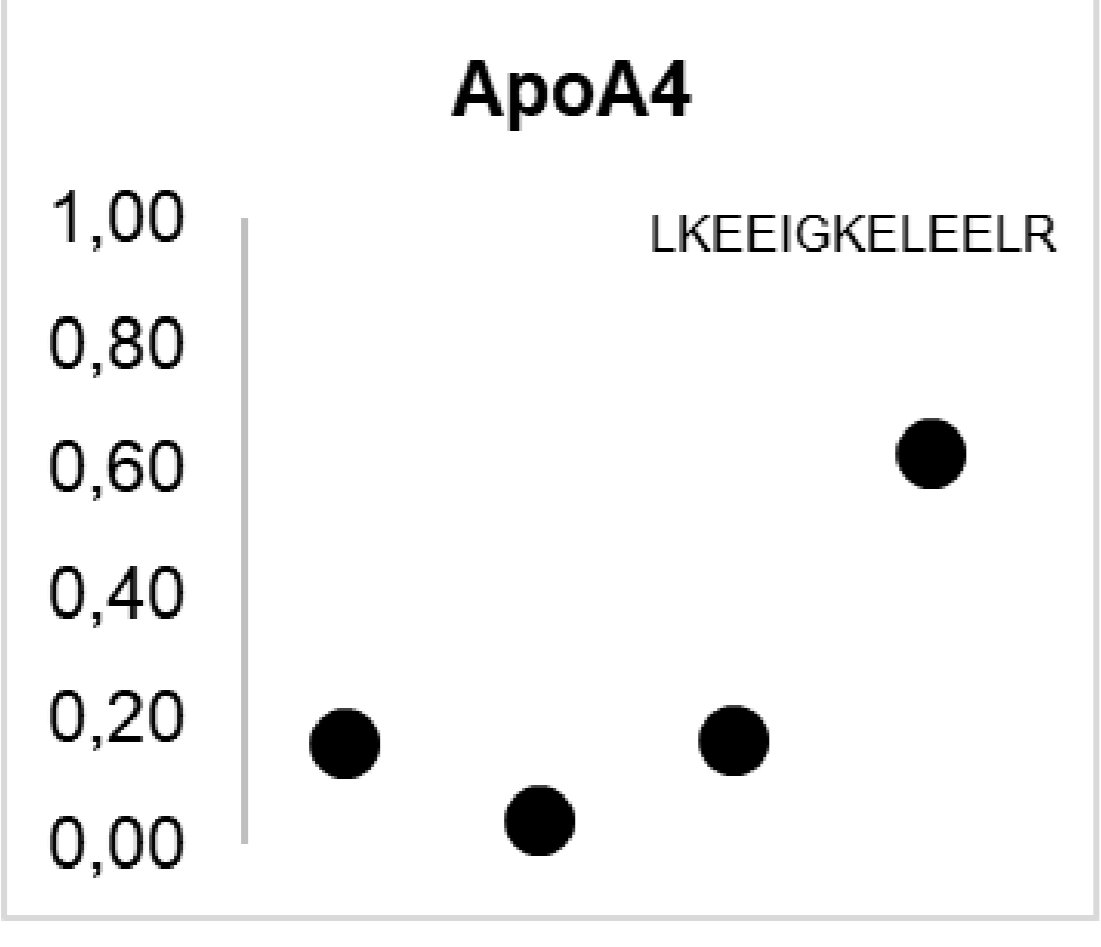

$\alpha 0$   $\alpha 1$   $\alpha 2$   $\alpha 3$

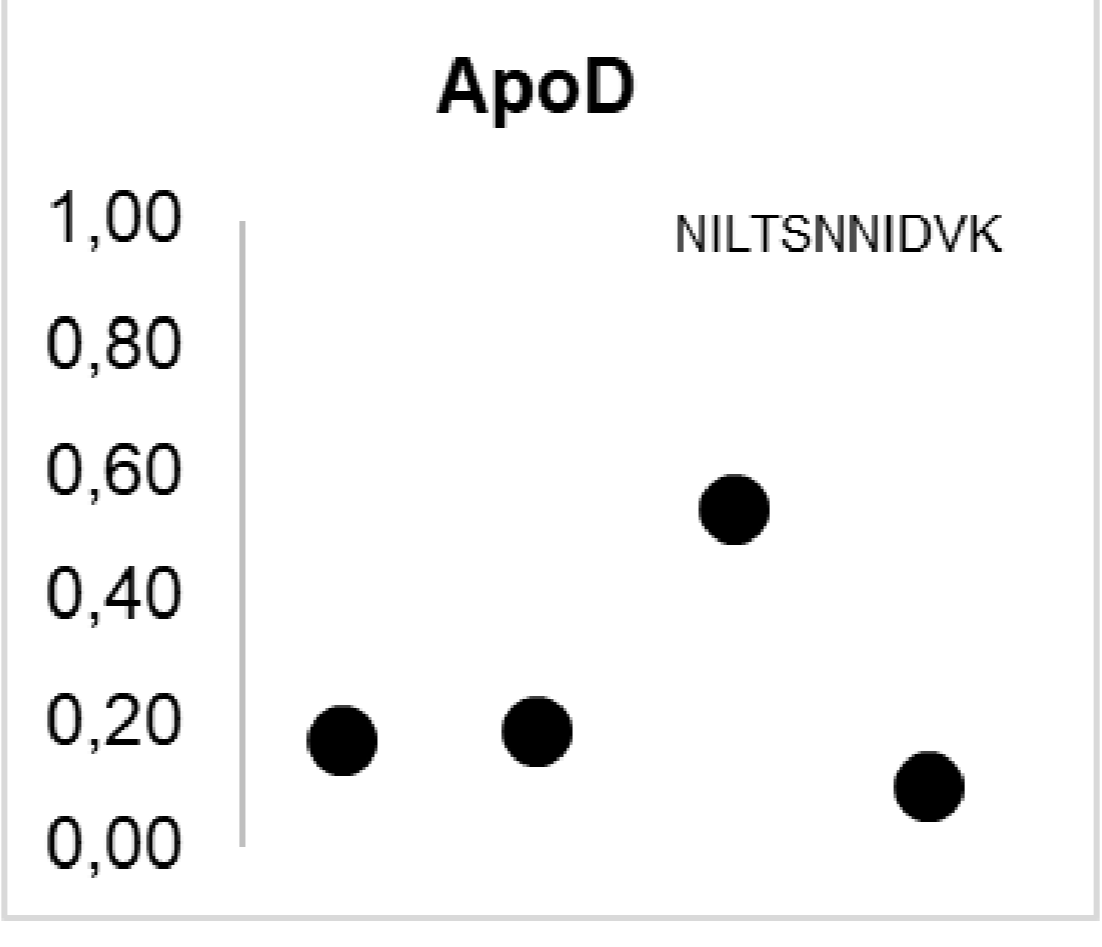

$\alpha 0$   $\alpha 1$   $\alpha 2$   $\alpha 3$

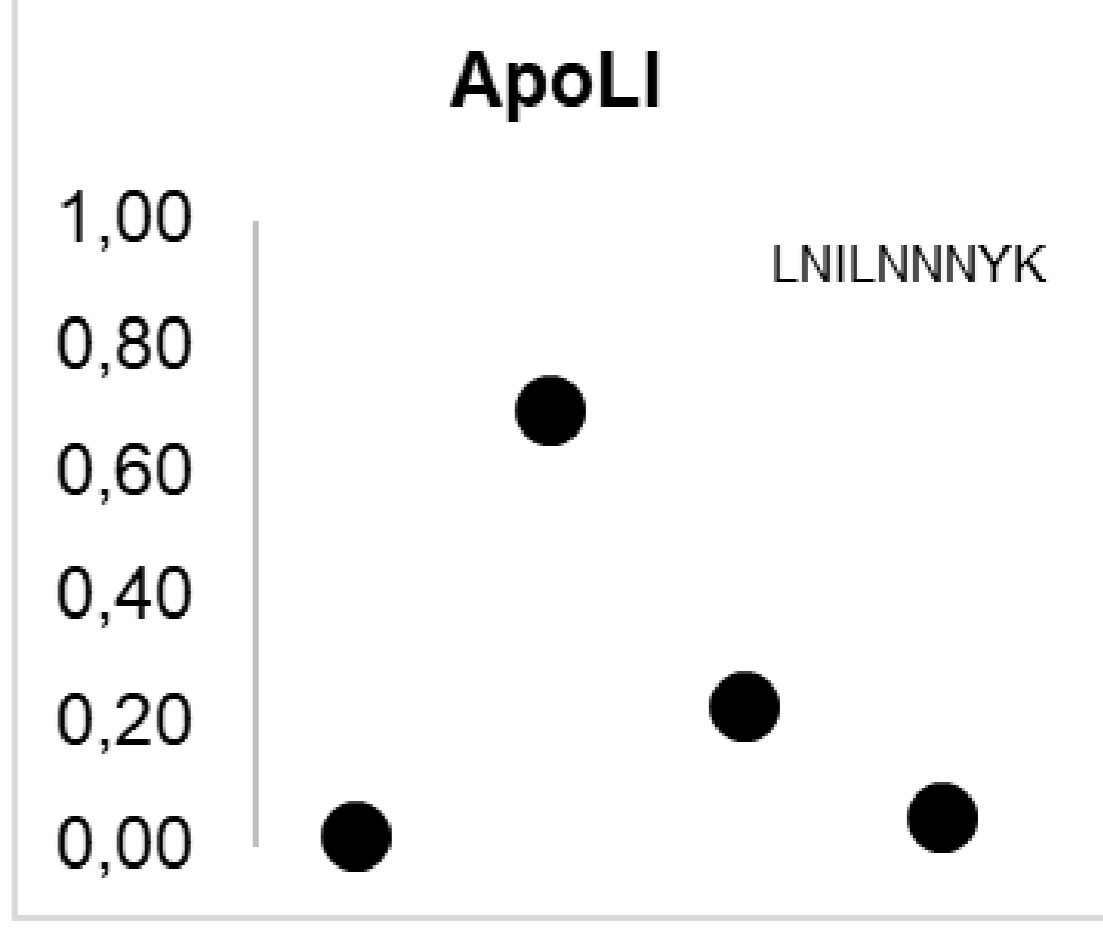

$\alpha 0$   $\alpha 1$   $\alpha 2$   $\alpha 3$

Supporting Information 2

Gating Strategy

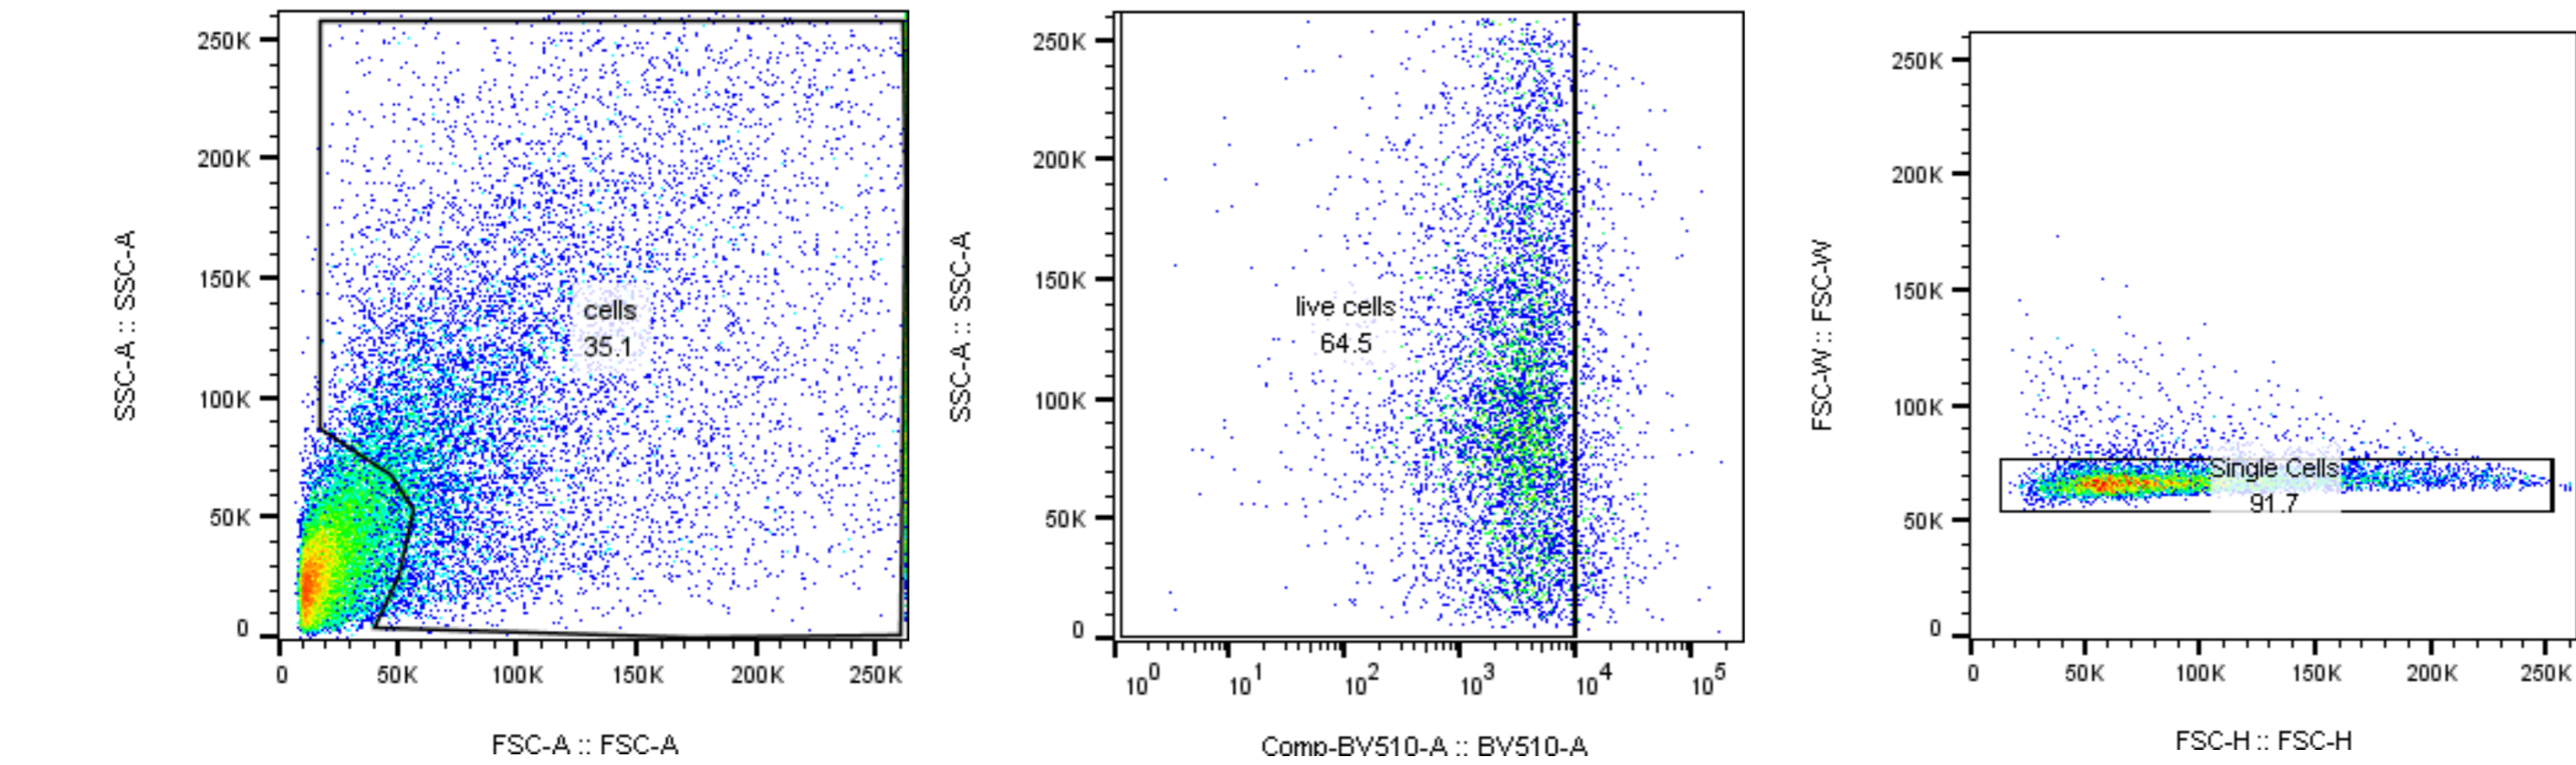

CD68 (APC) + ApoD (PE)

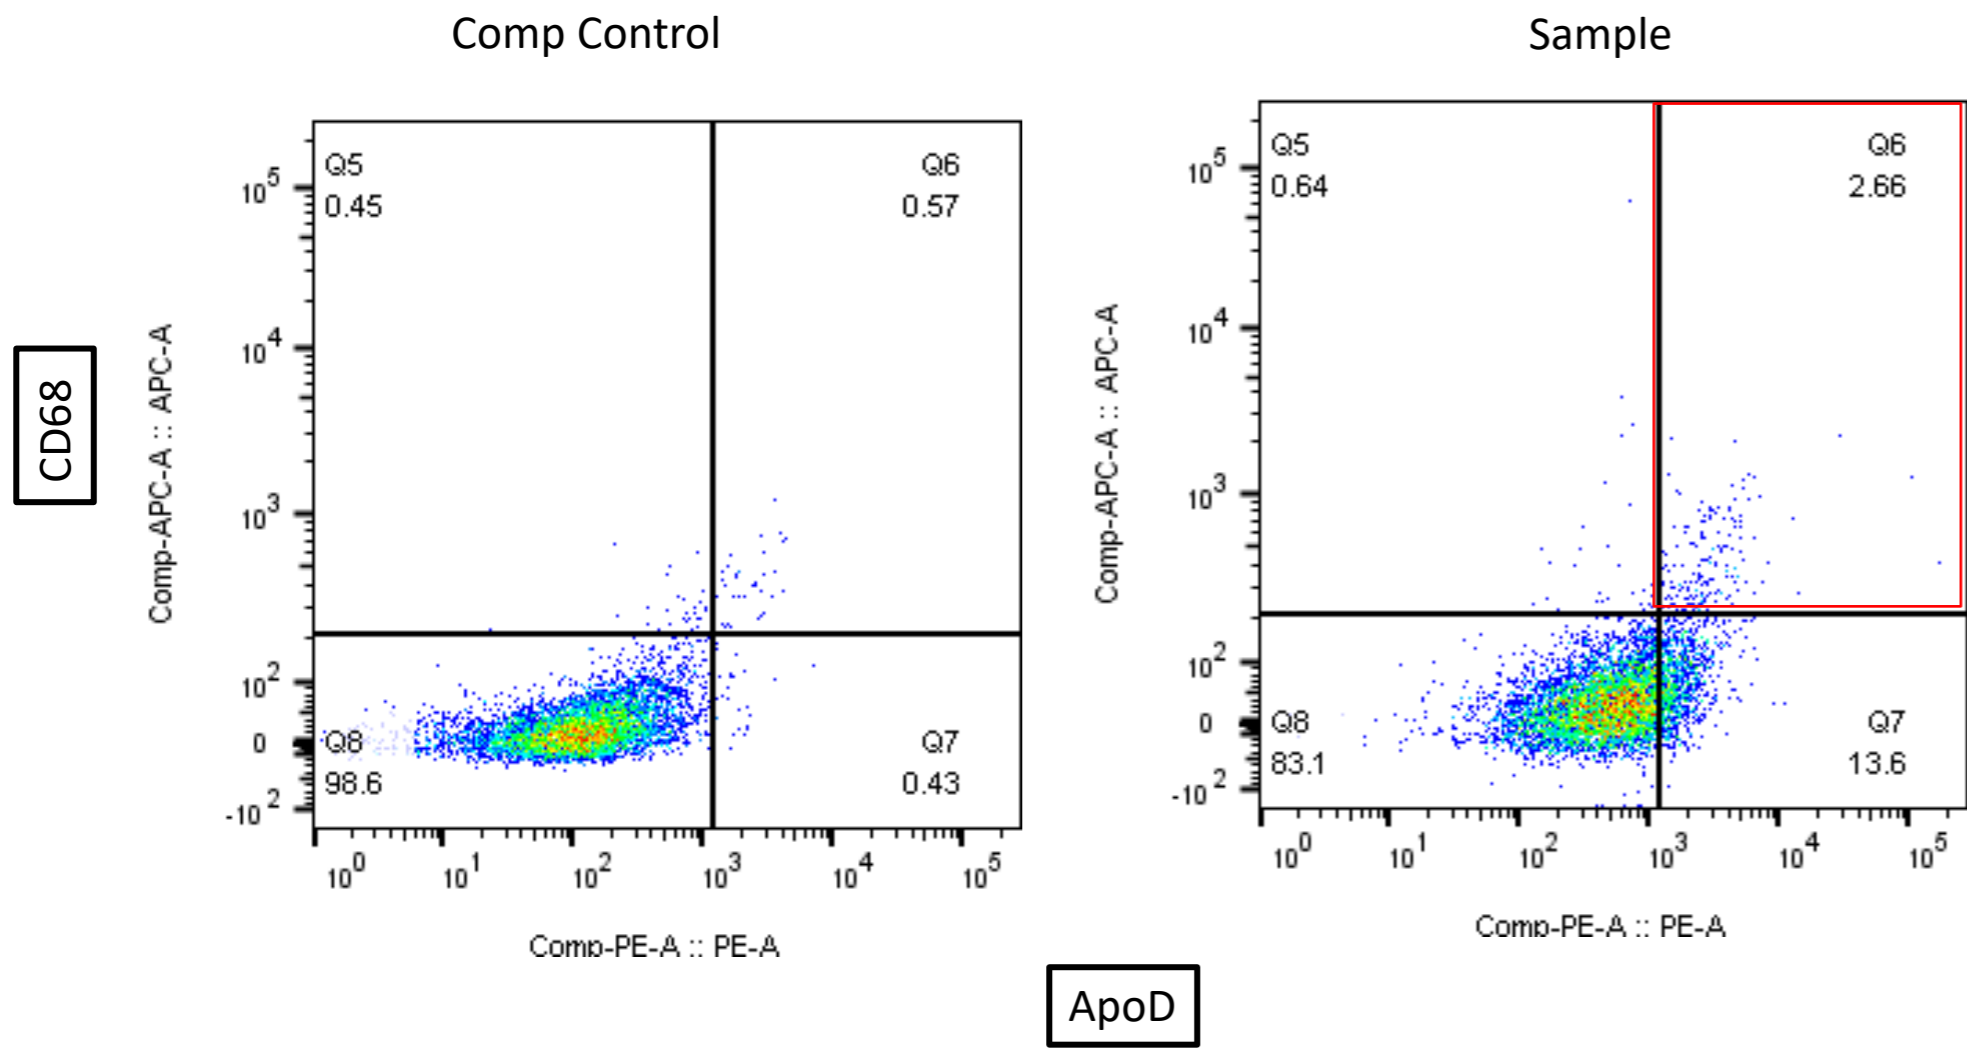

ApoJ (APC) + aSMA (APC-cy7)

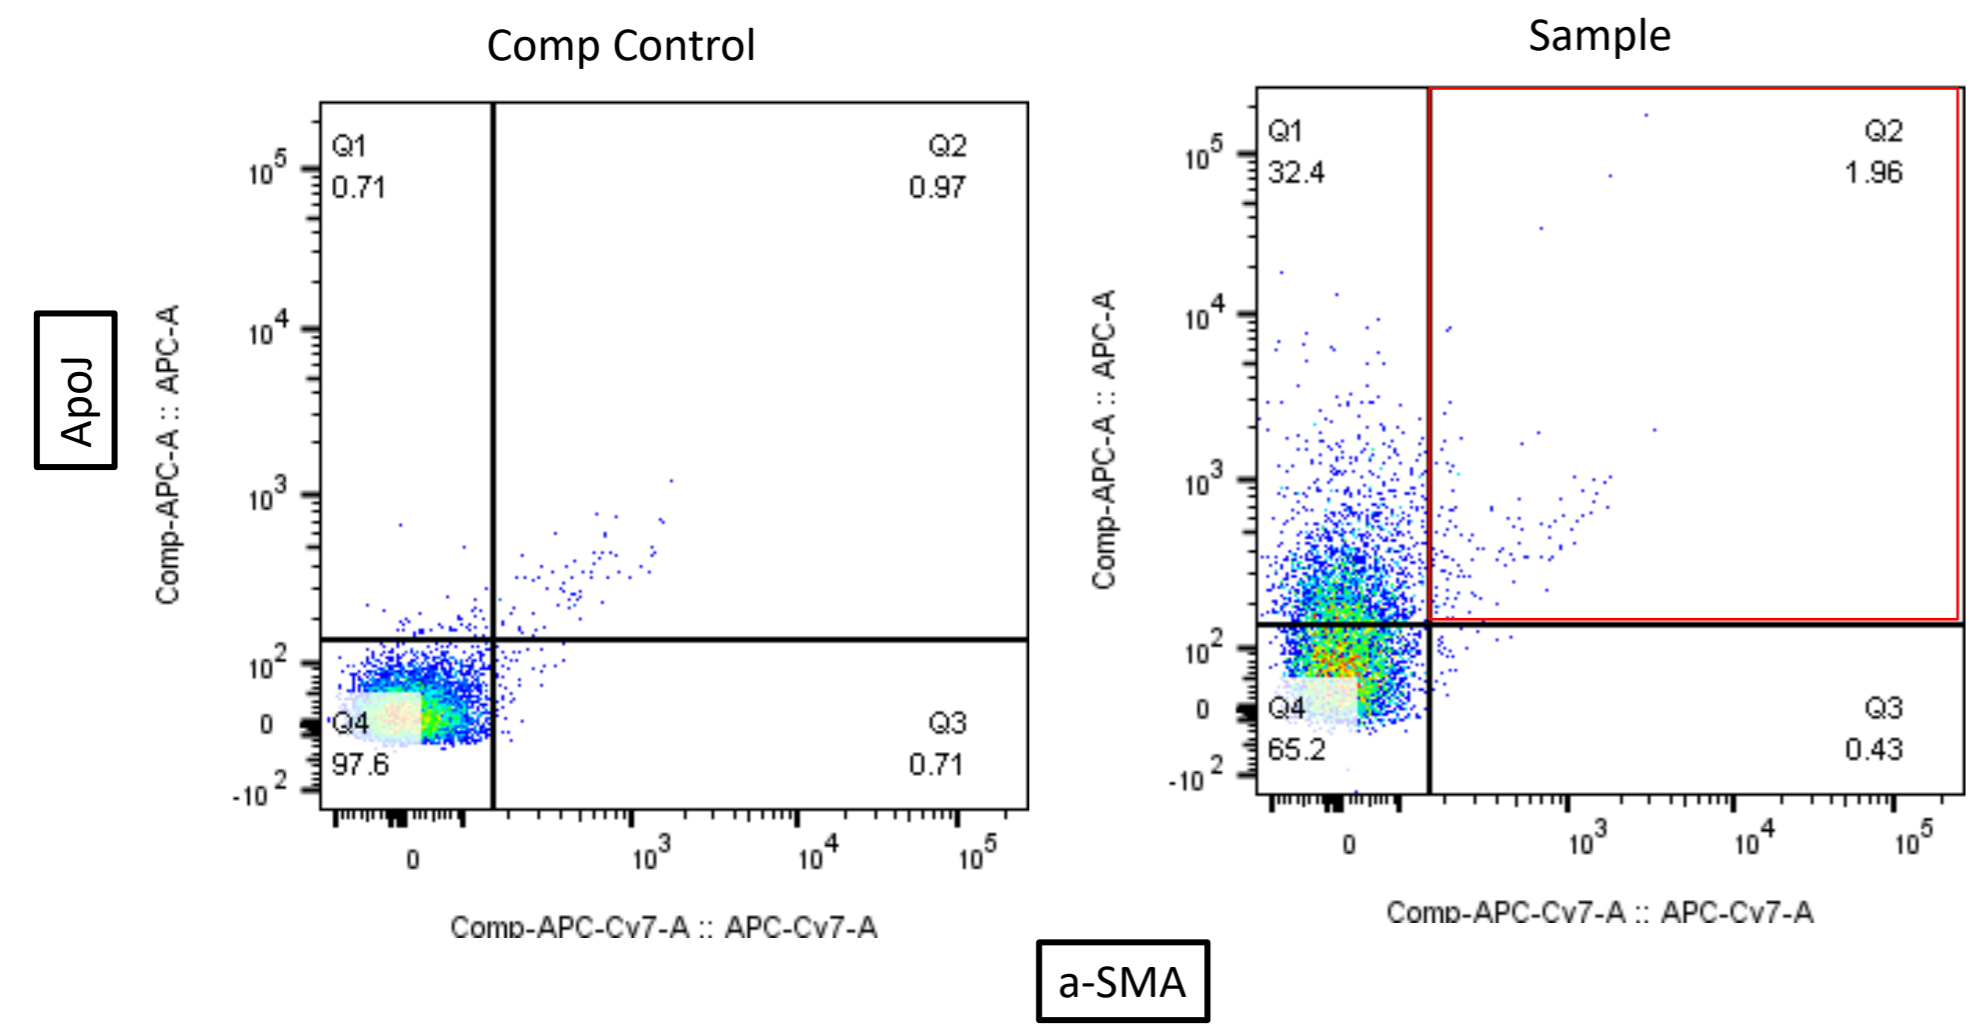

Enriched in apoC-III vs. NM protein module

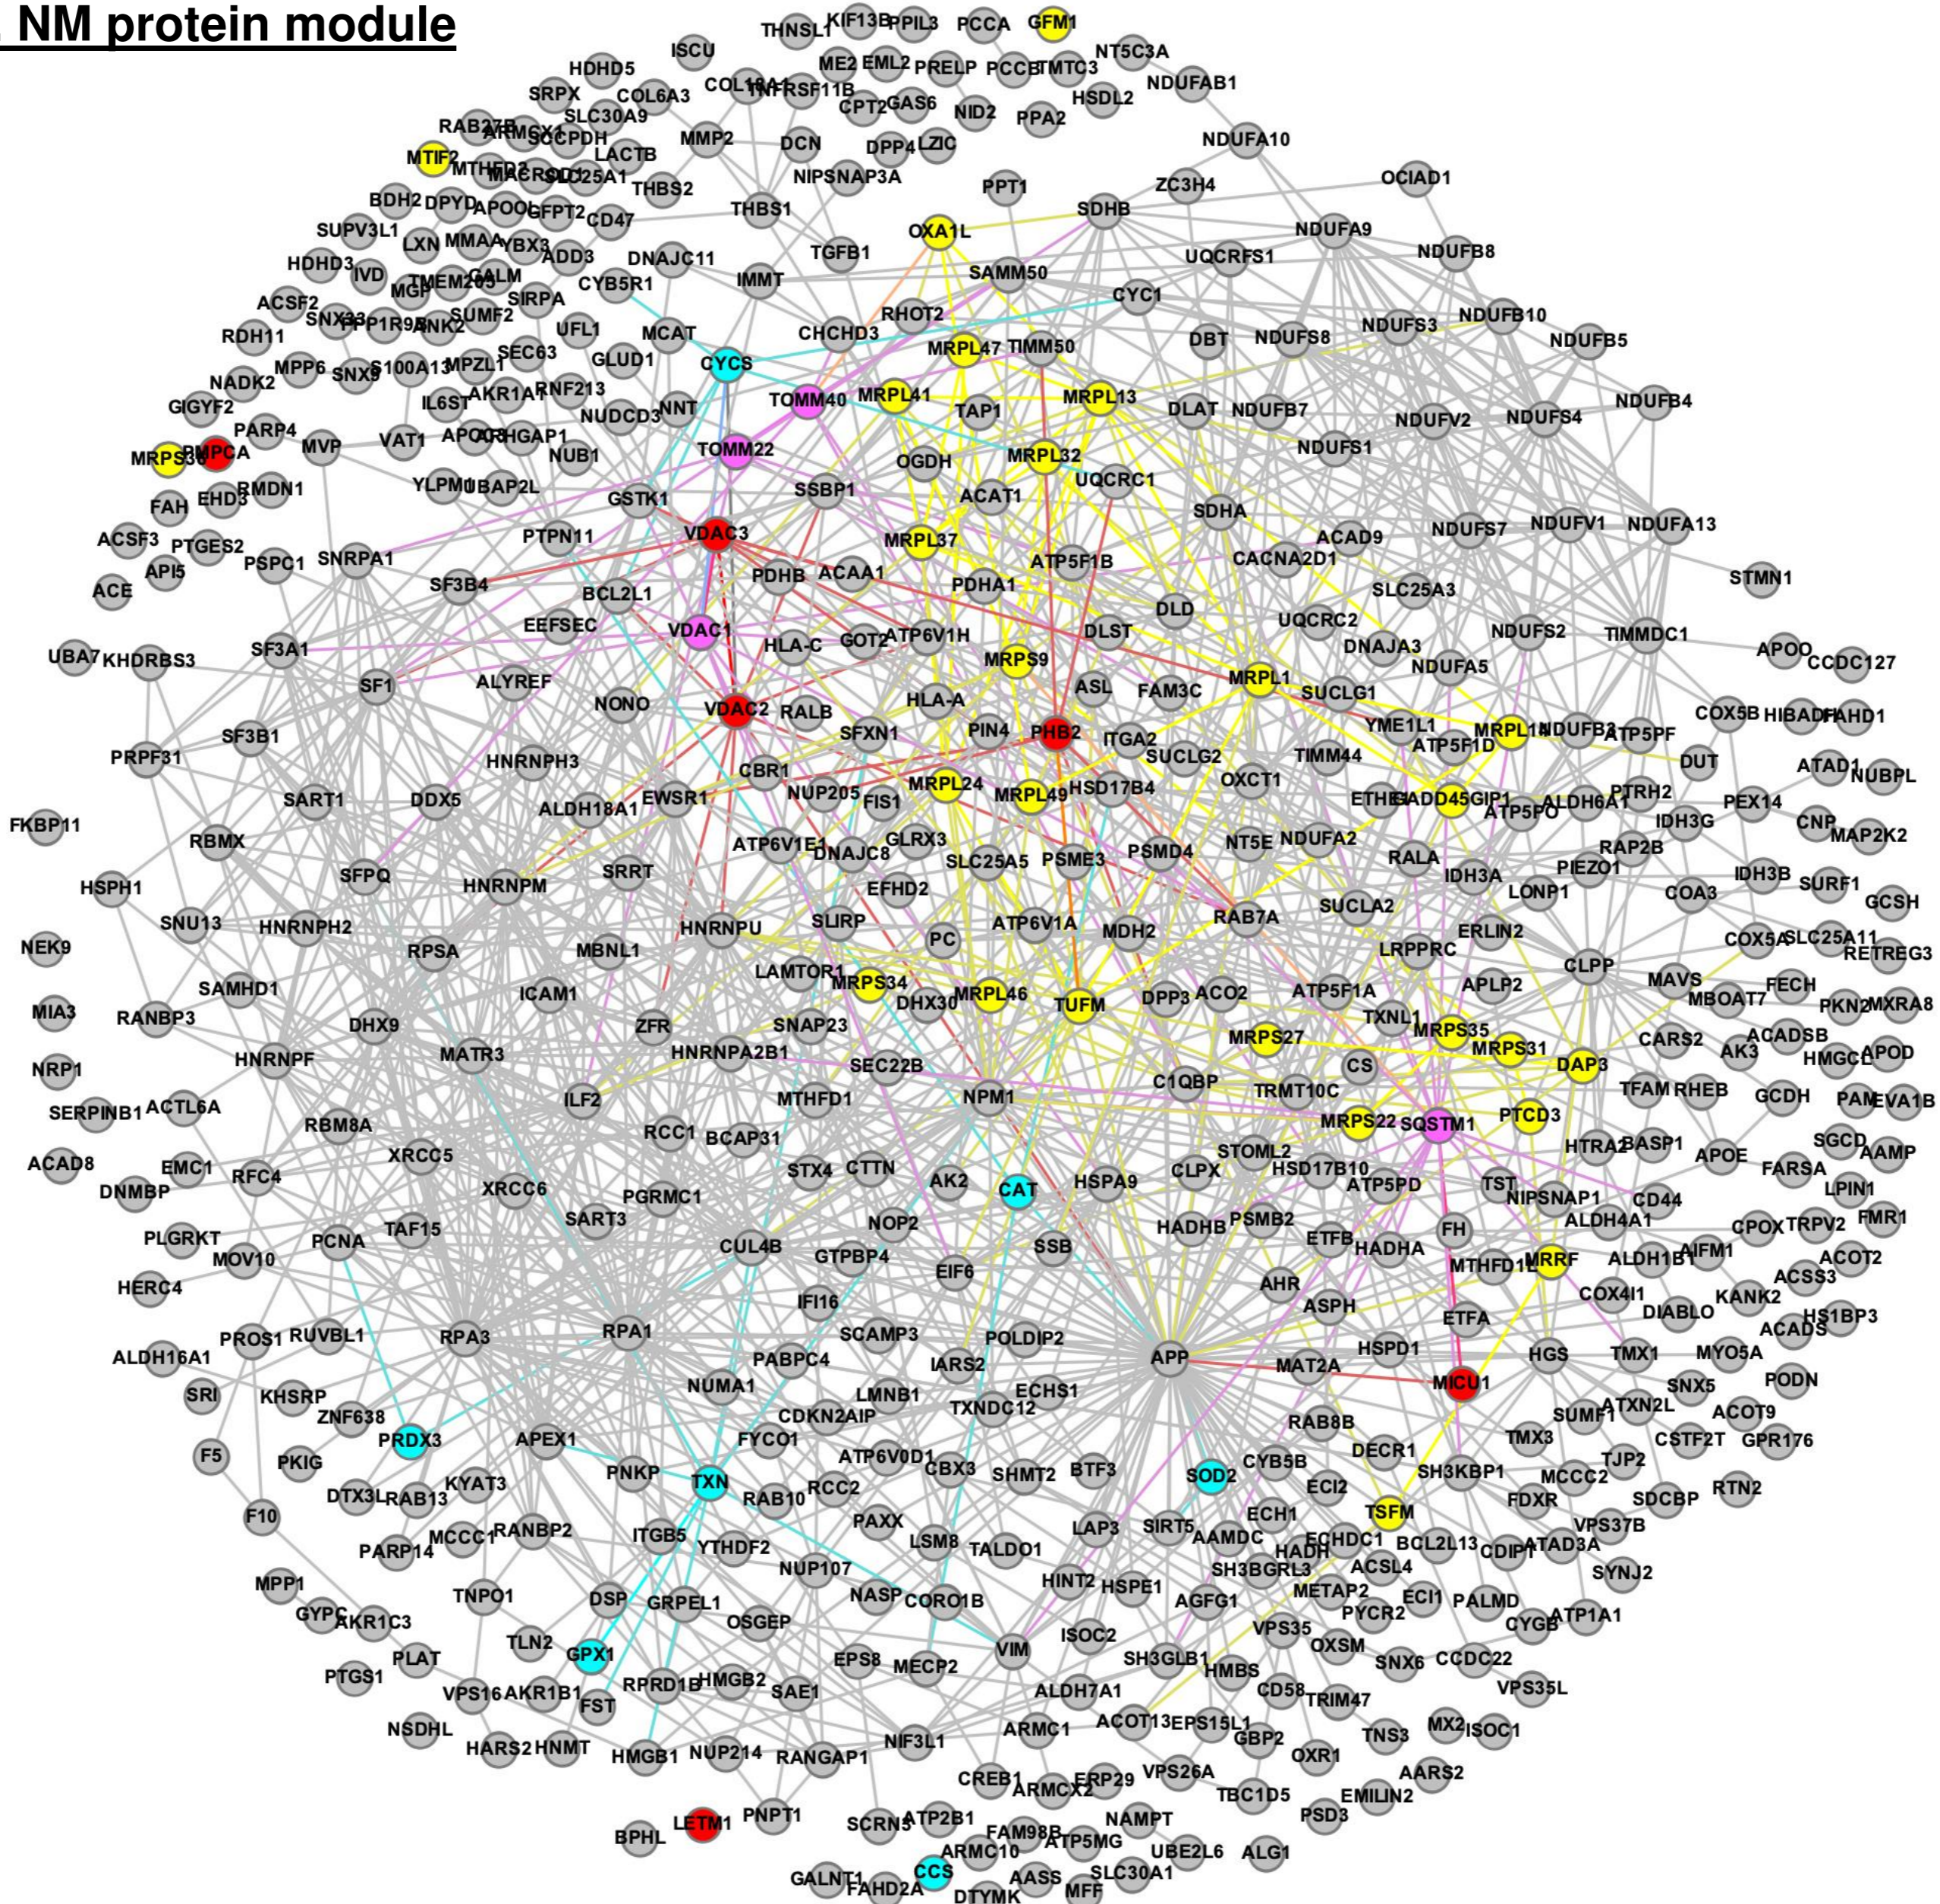

Enriched in apoC-III vs. PM protein module

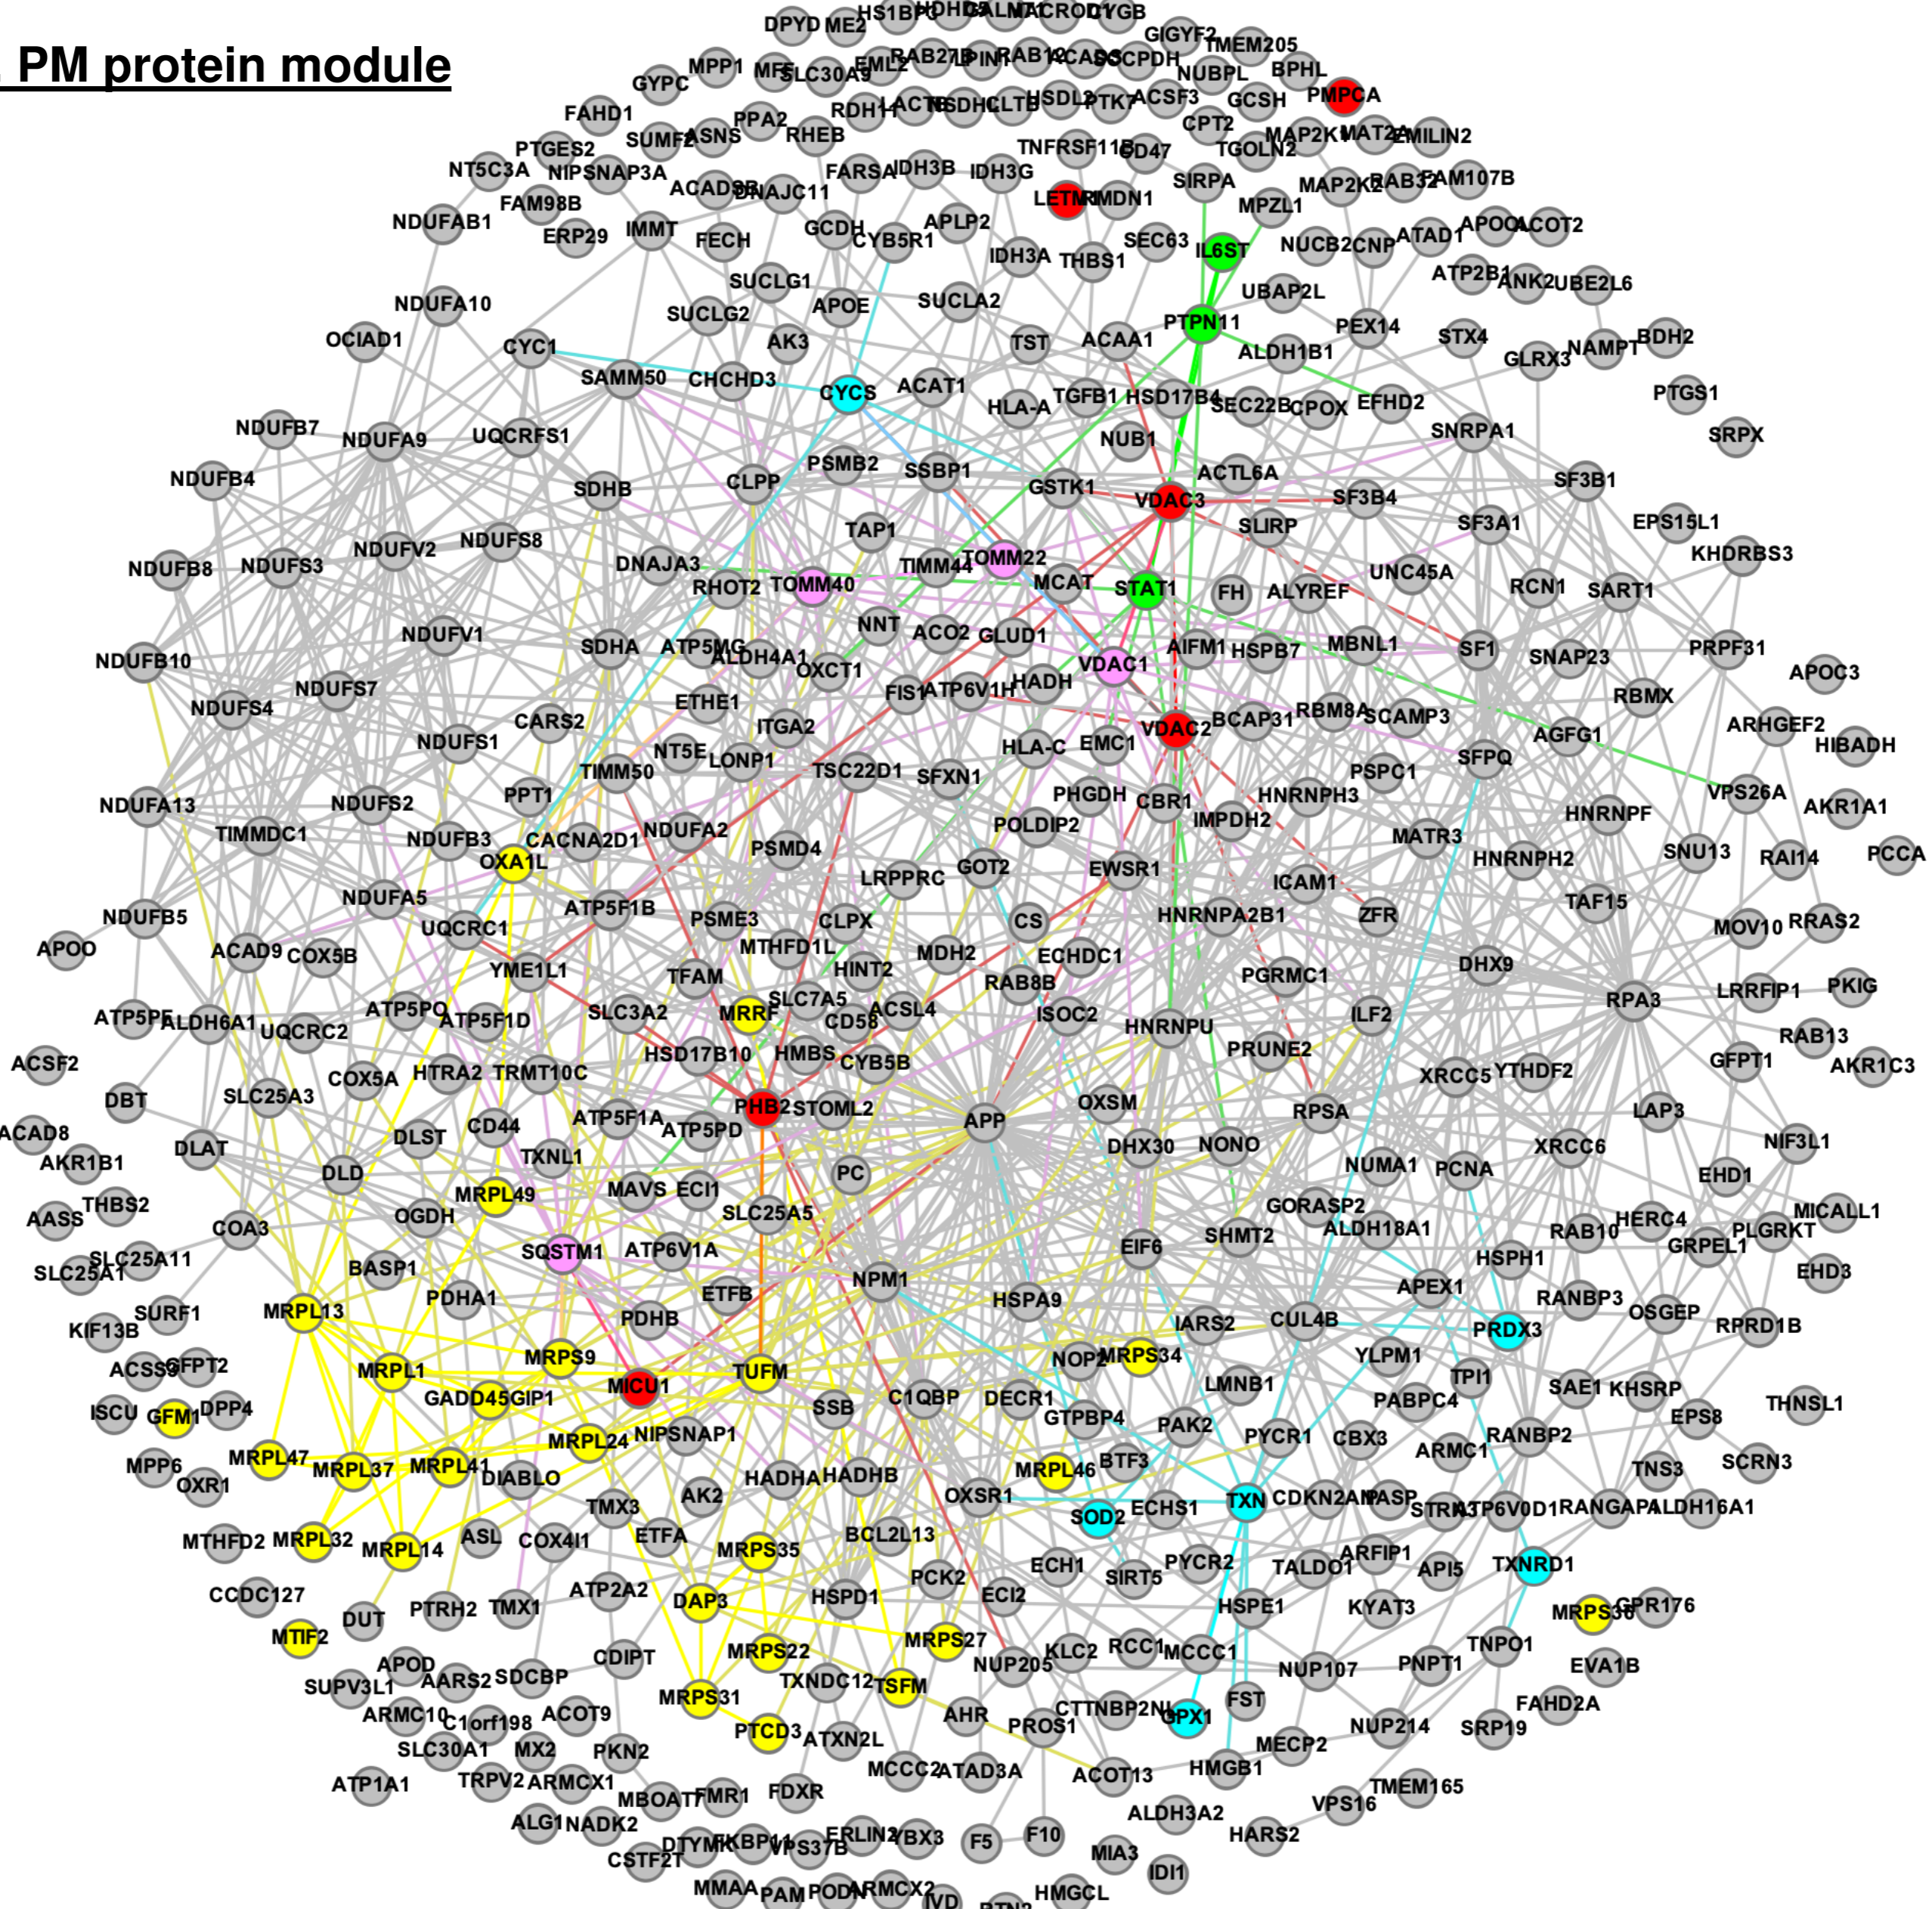

## Supporting Information 4A

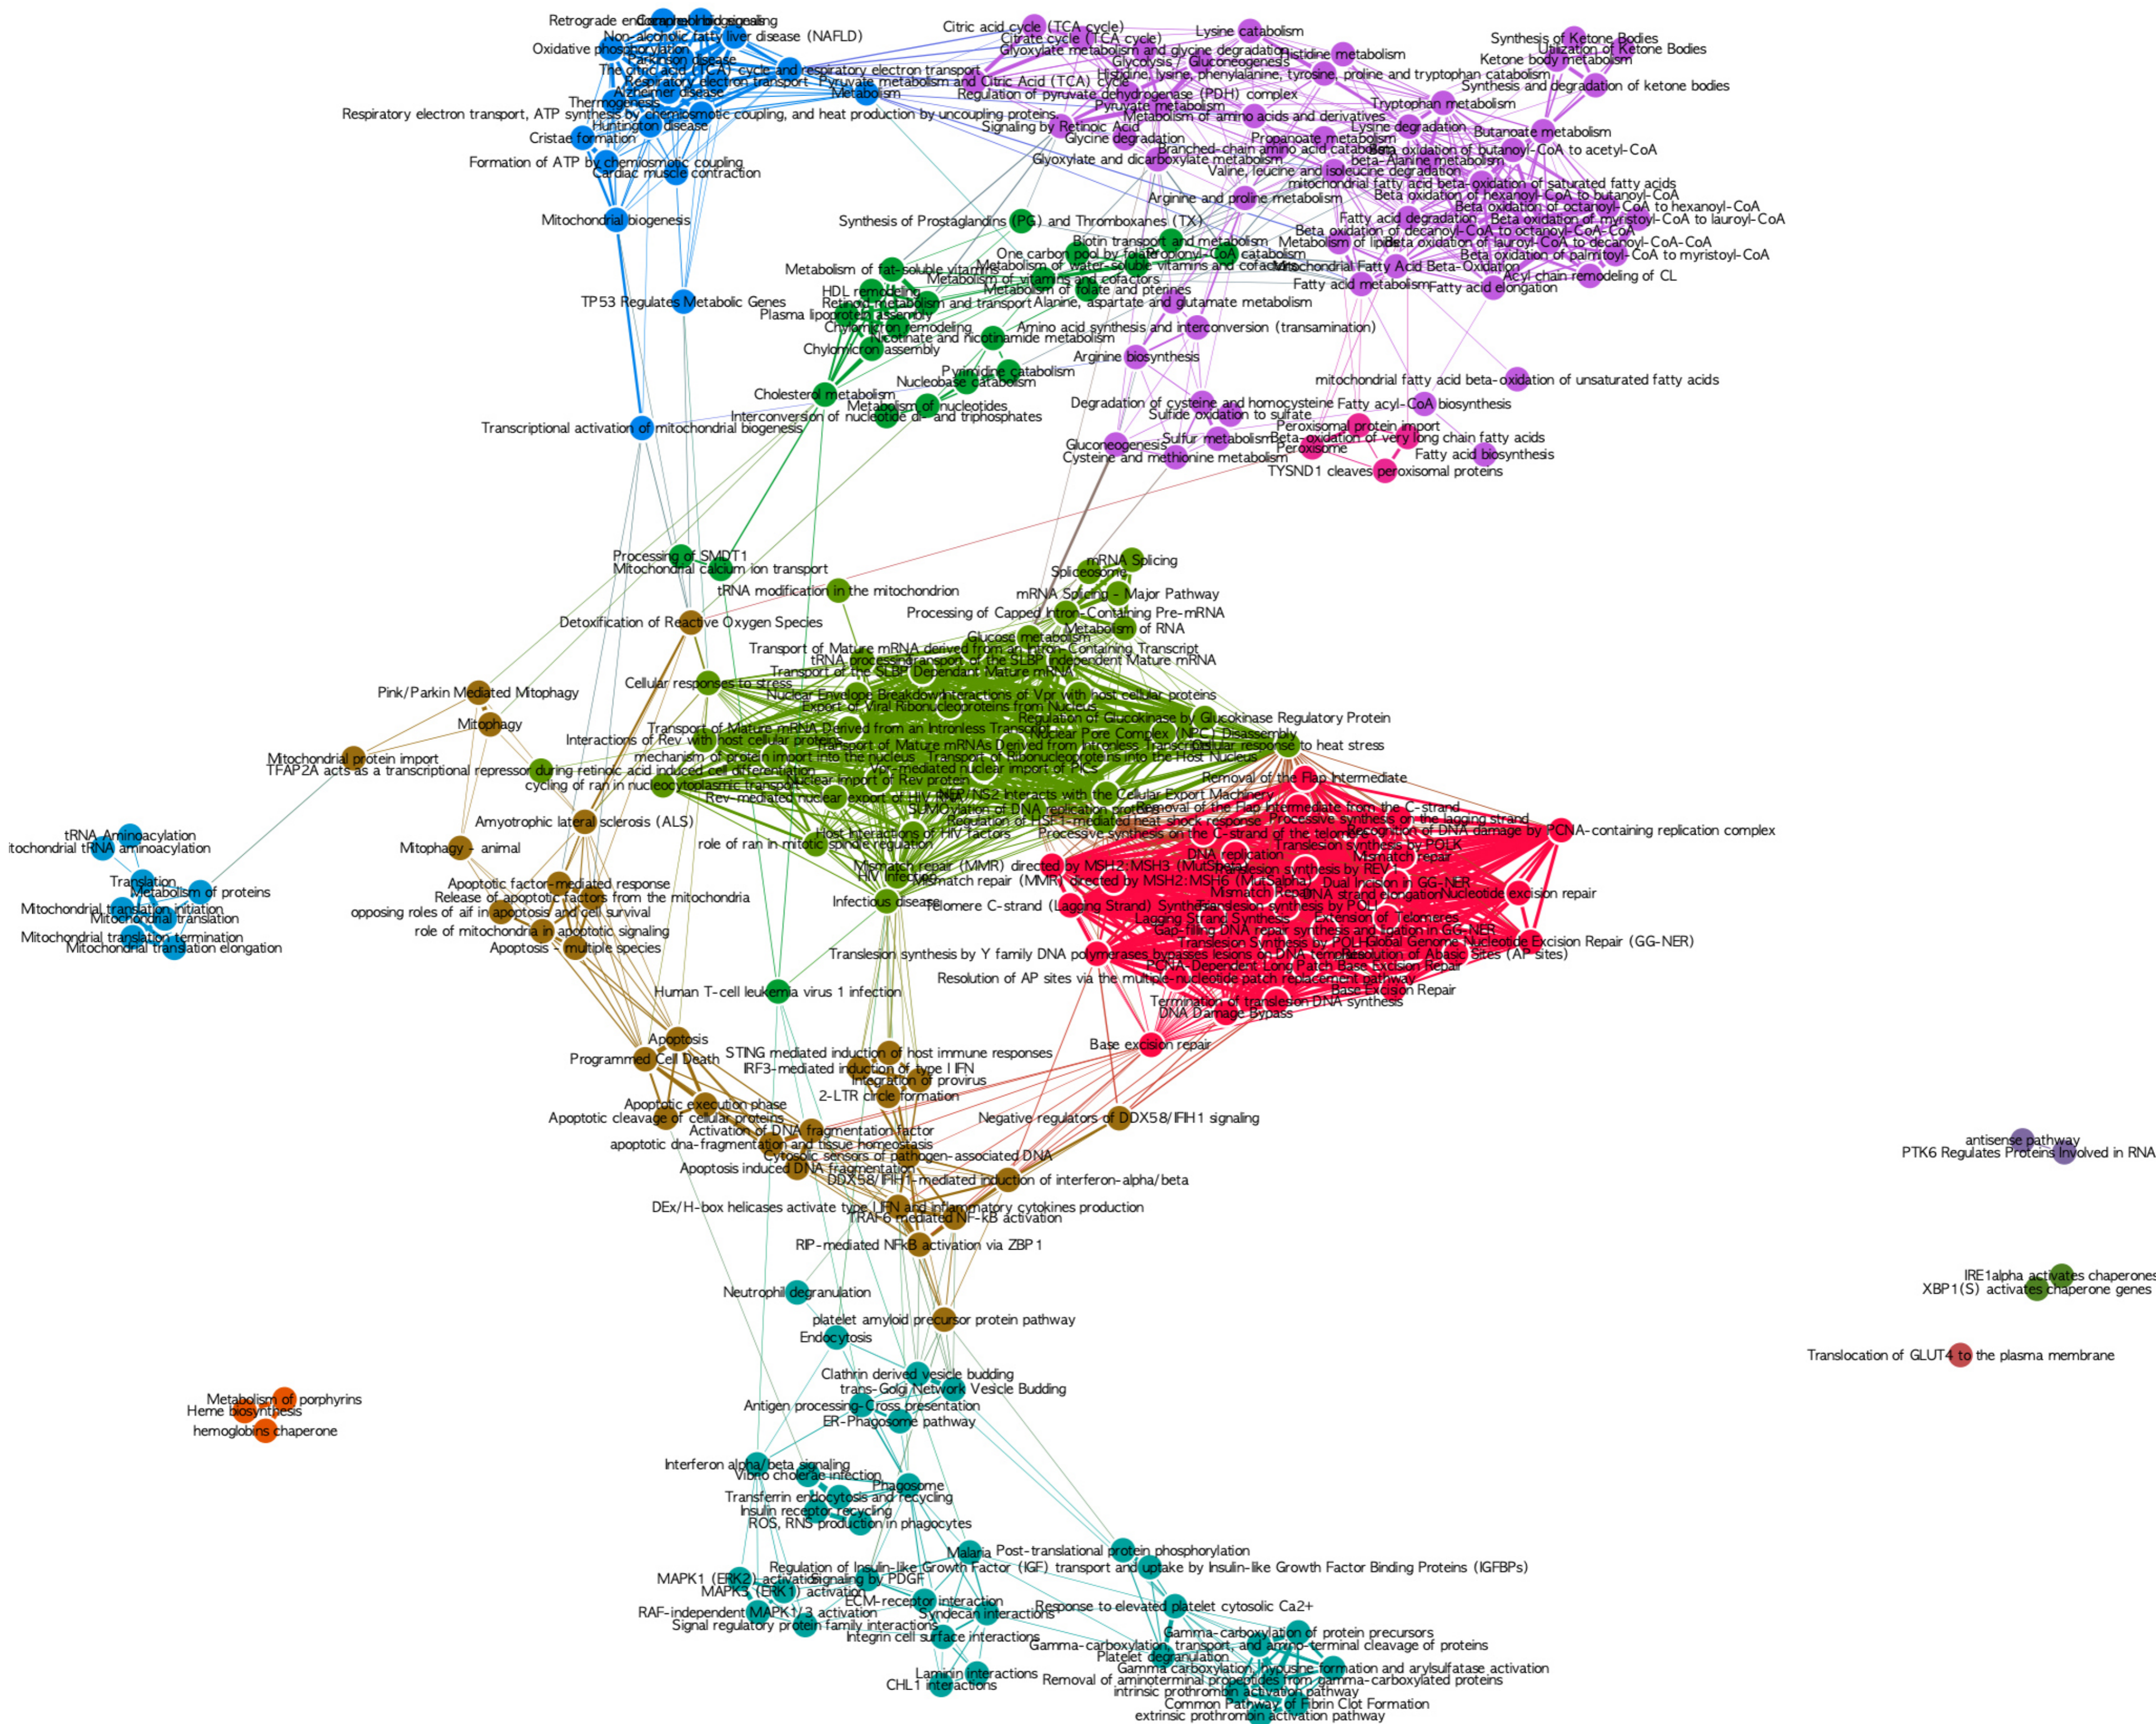

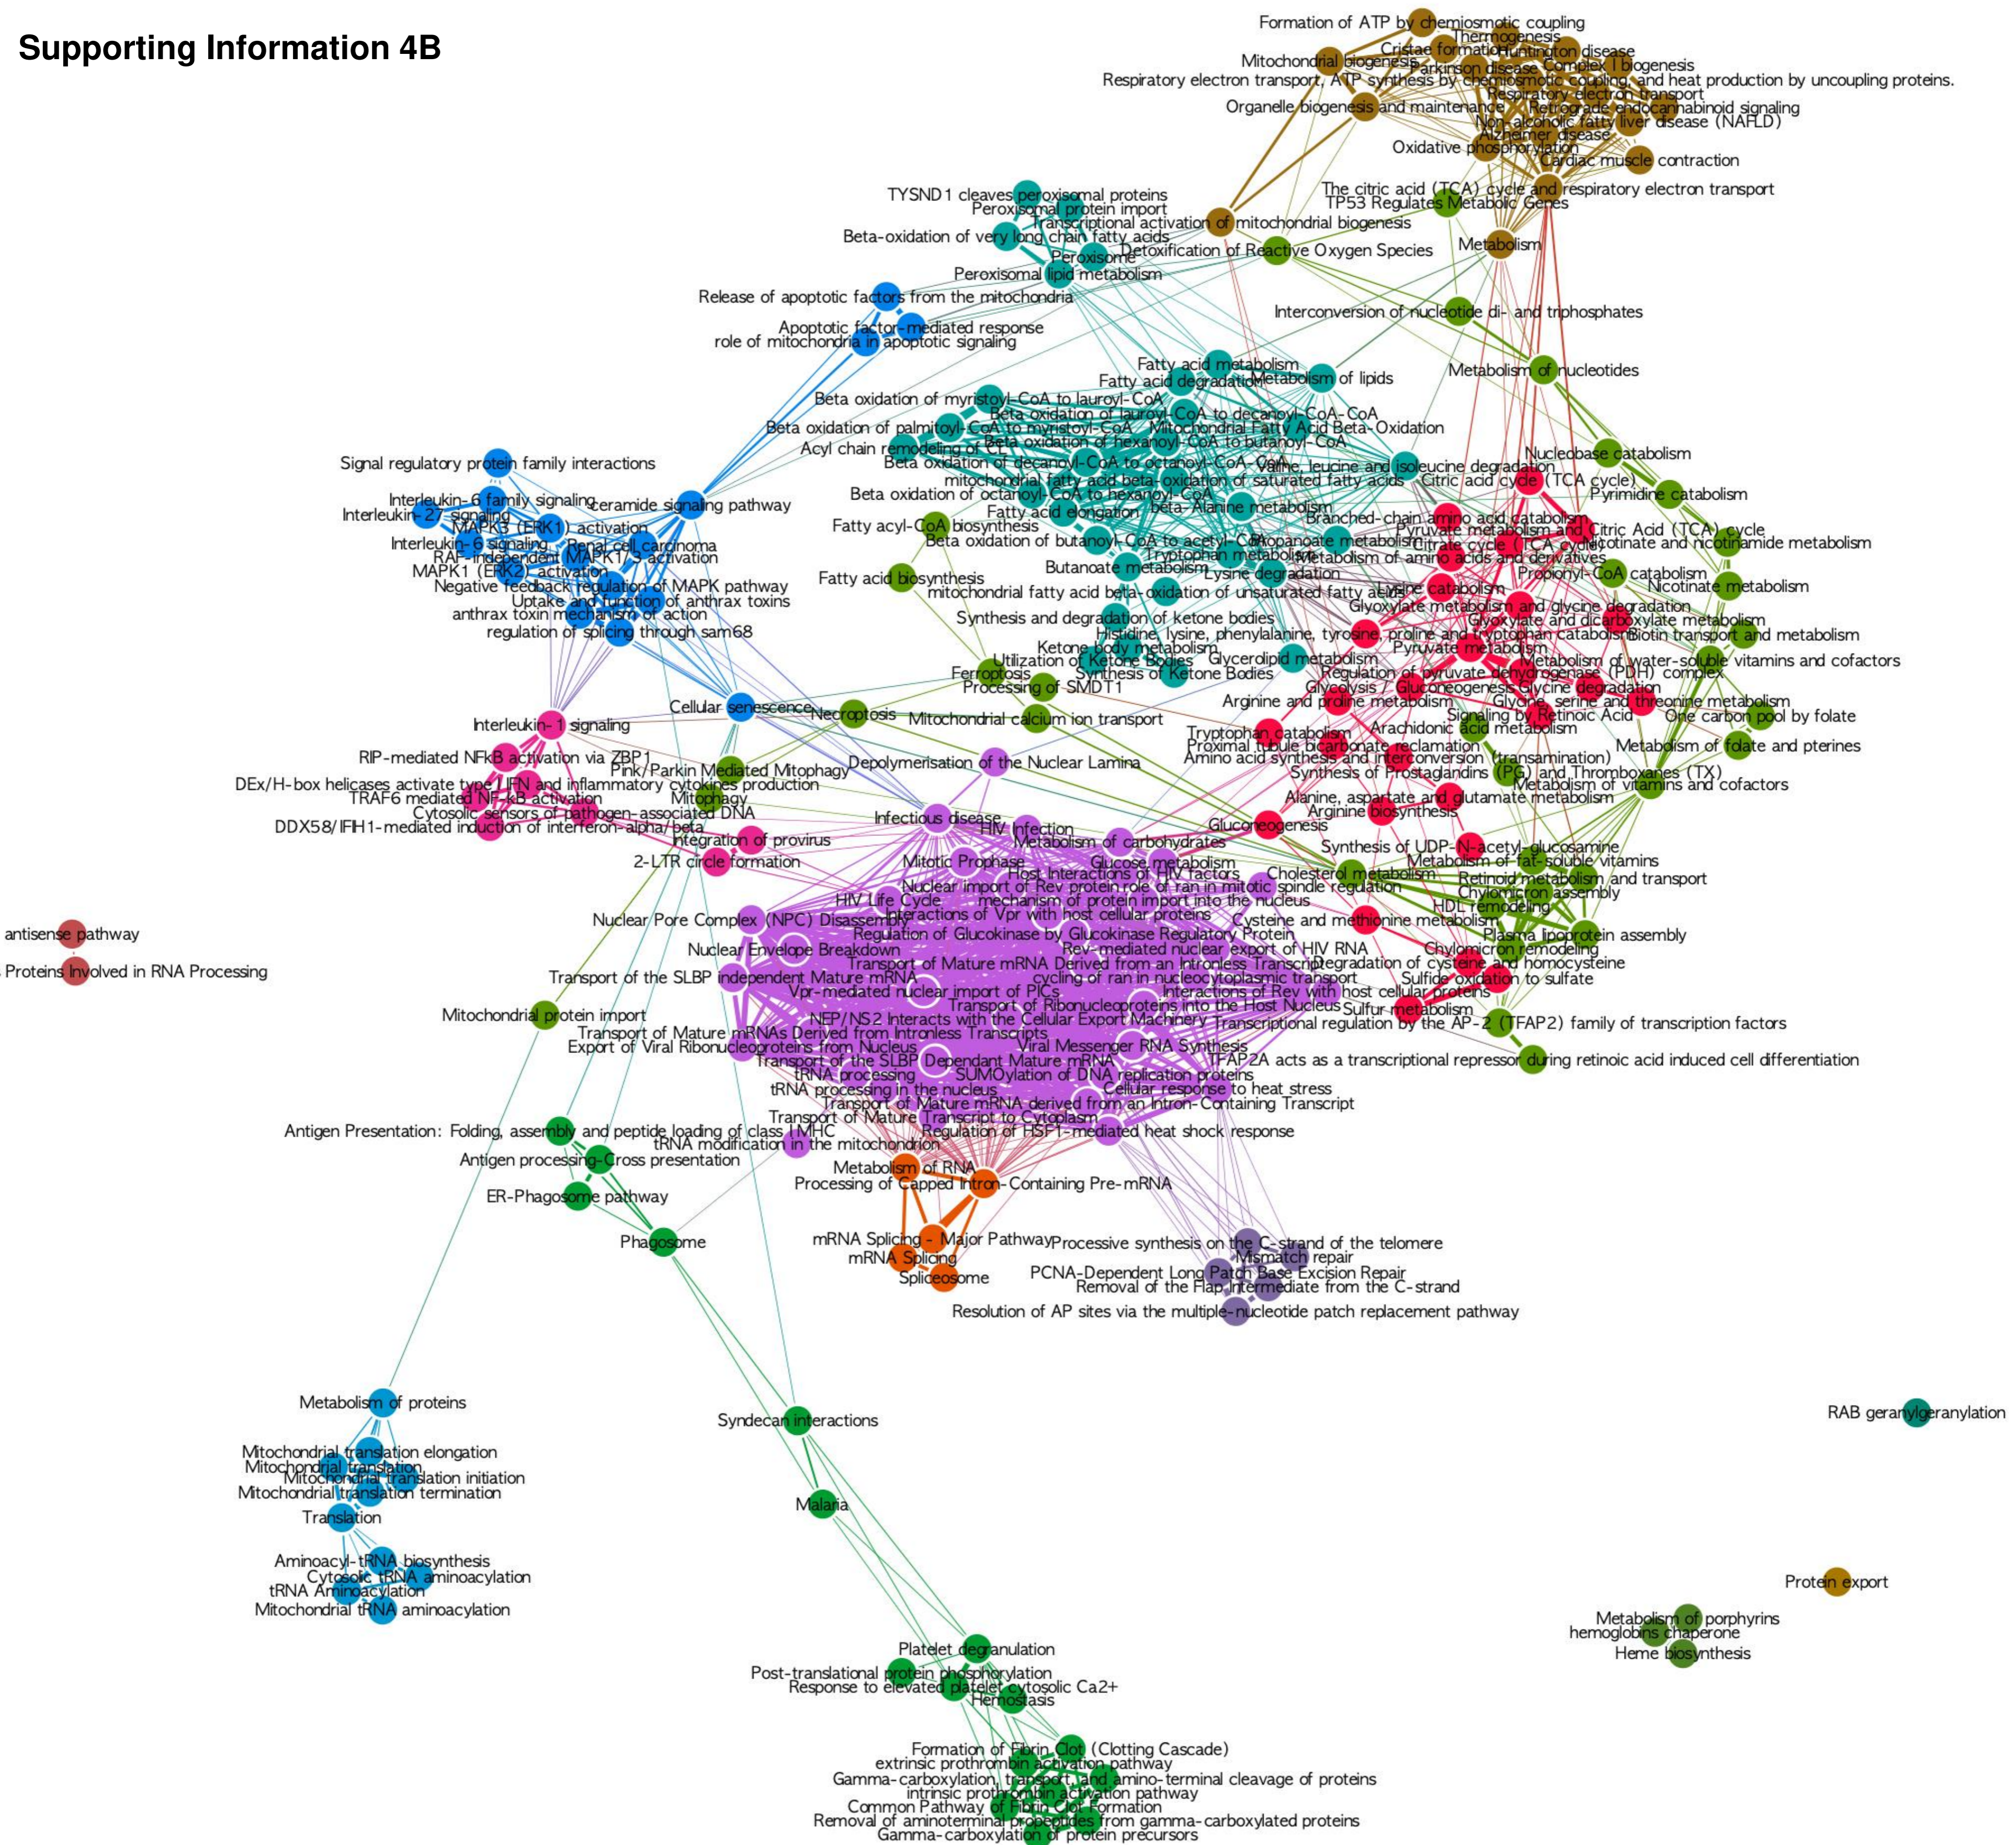

Calcificasome

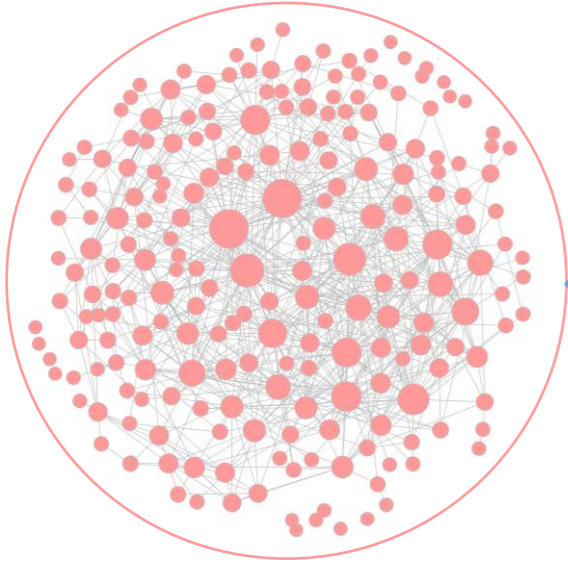

Inflammasome

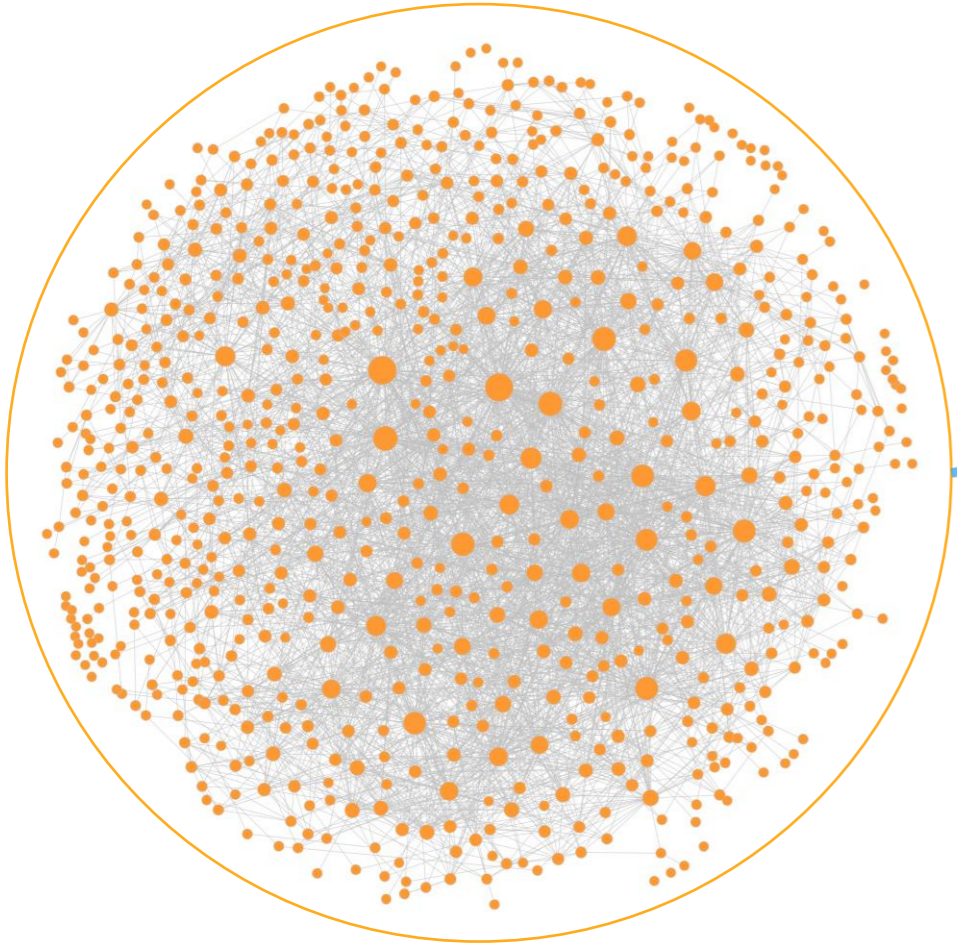

ApoC3 highlighted pathways

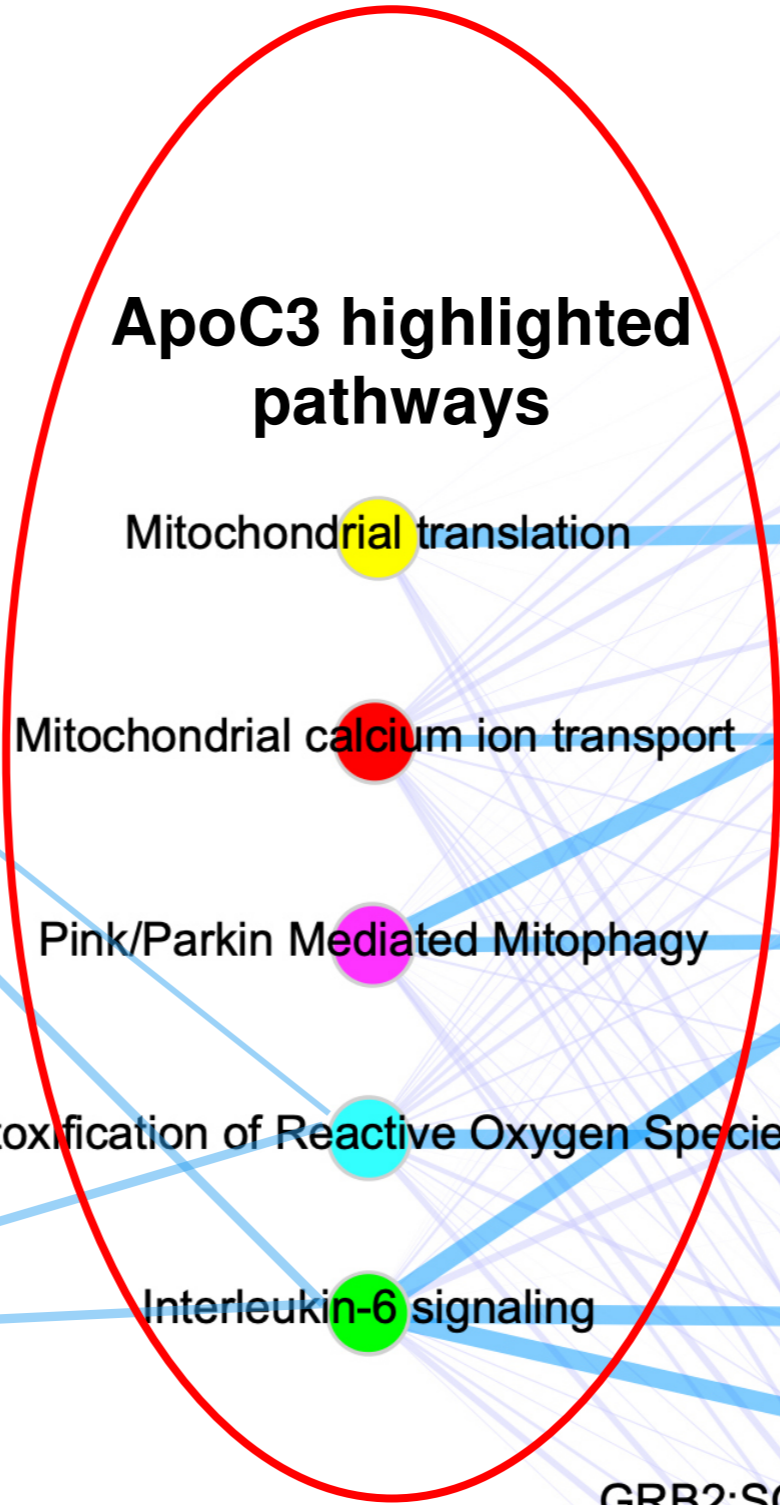

CAVD pathways

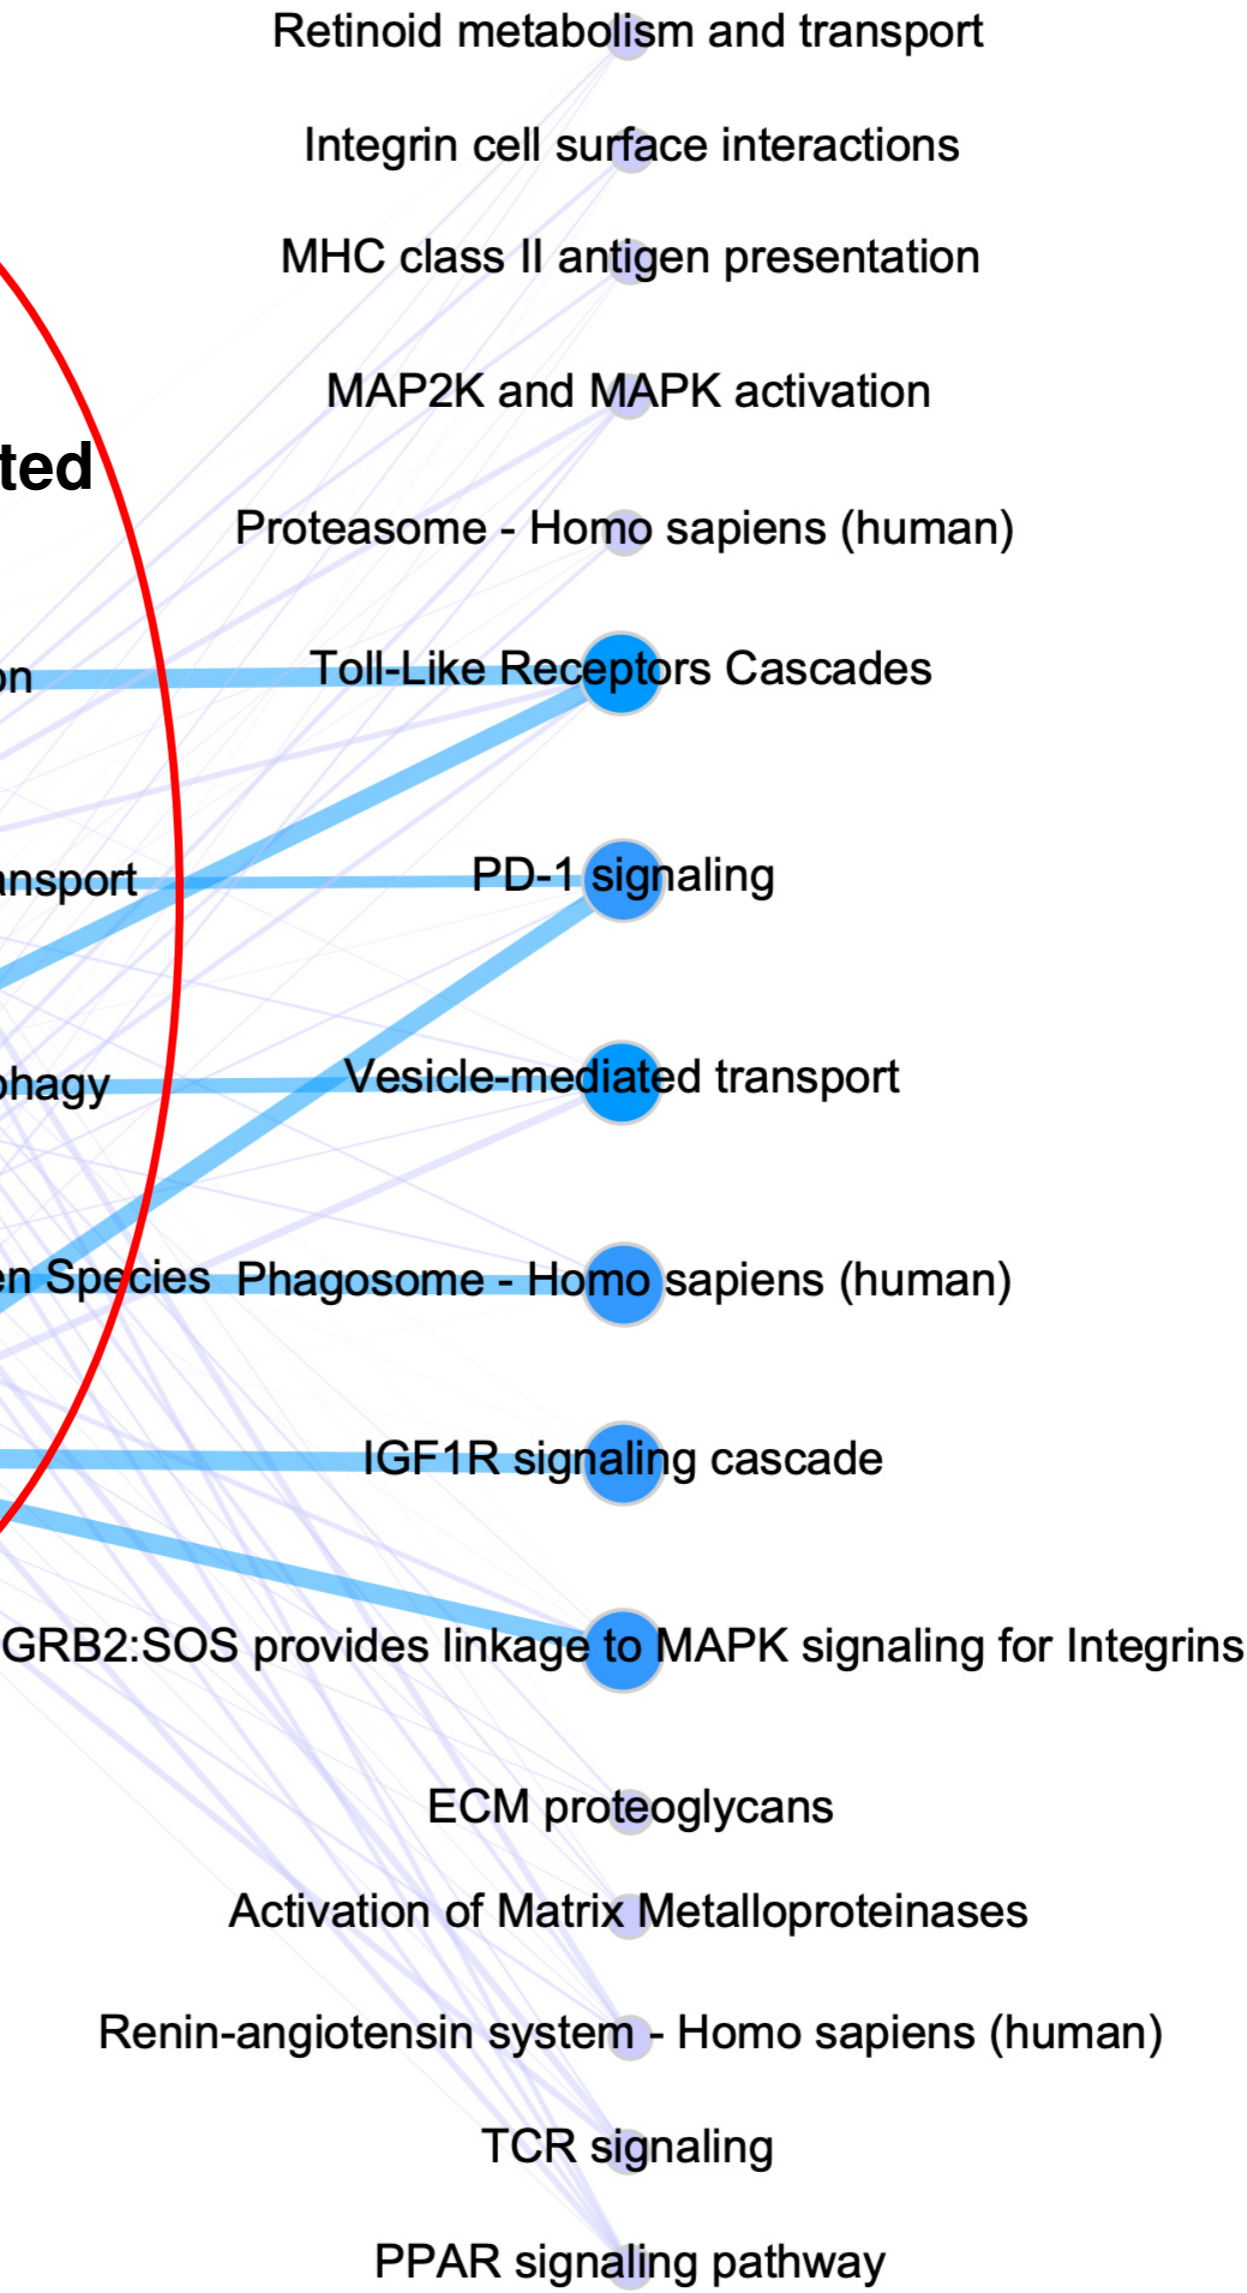

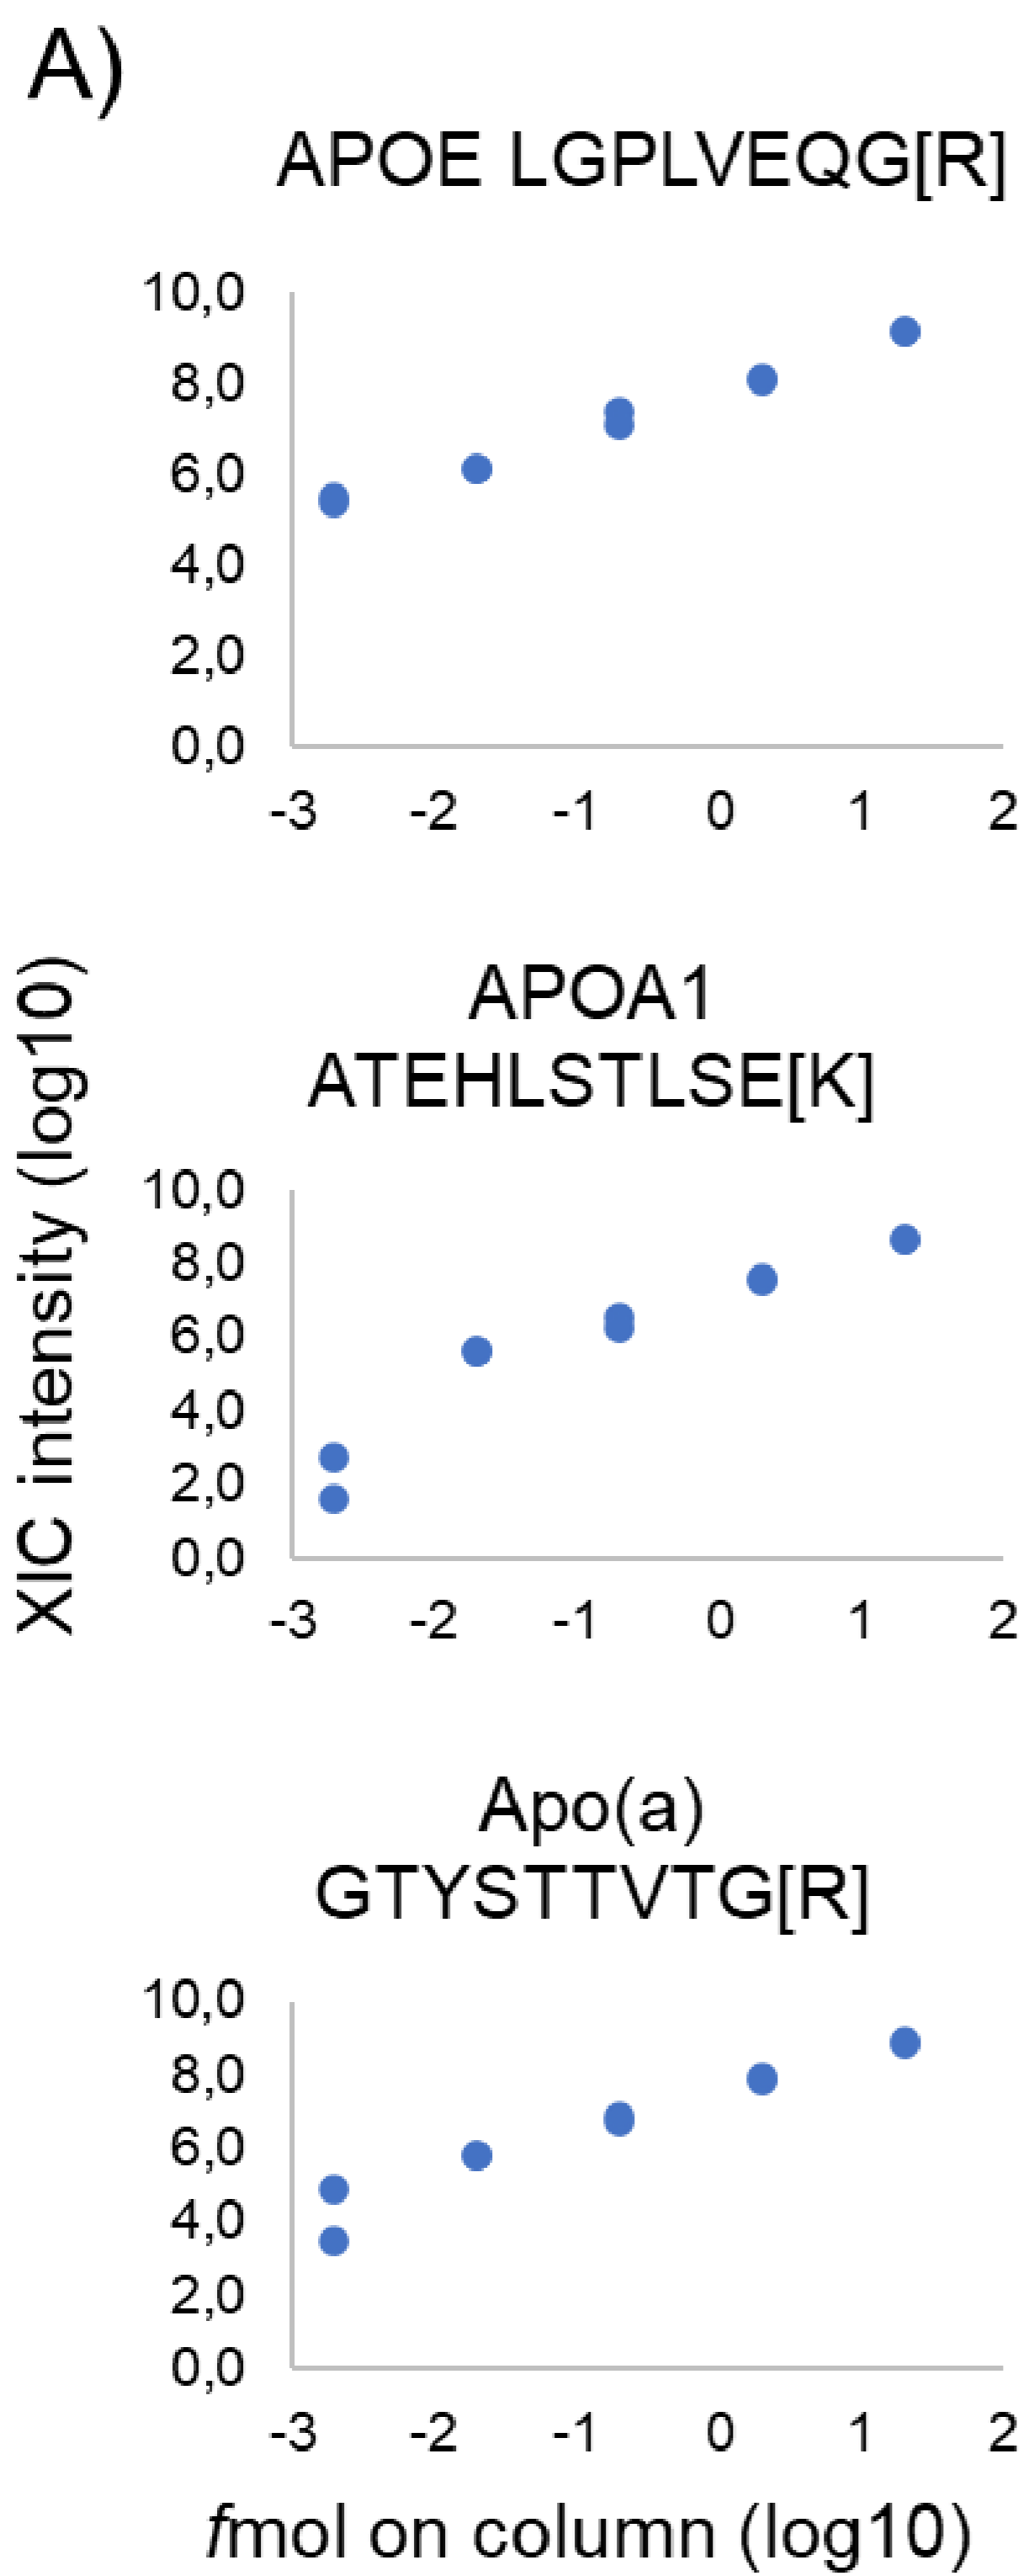

B)

|           | Mass [m/z] | CS [z] | Start [min] | End [min] | SEQUENCE_APOLIPOPROTEIN         | Observed |
|-----------|------------|--------|-------------|-----------|---------------------------------|----------|
| PRM set 1 | 384,212    | 3      | 6           | 9         | KATVVYQGER_APOH                 | yes      |
|           | 405,8787   | 3      | 8           | 11        | ATEHLSTLSEK_APOA1               | yes      |
|           | 408,55     | 3      | 8           | 11        | <b>ATEHLSTLSEK[label]_APOA1</b> | no       |
|           | 644,3362   | 2      | 8           | 12        | TQVNTQAEQLR_APOA4               | yes      |
|           | 438,5772   | 2      | 9           | 12        | AKLEEQAQQIR_APOE                | yes      |
|           | 511,7669   | 2      | 9           | 12        | ATVVYQGER_APOH                  | yes      |
|           | 484,7798   | 2      | 12          | 15        | LGPLVEQGR_APOE                  | yes      |
|           | 489,78     | 2      | 12          | 15        | <b>LGPLVEQGR[label]_APOE</b>    | yes      |
|           | 644,8226   | 2      | 15          | 19        | ELDESLQVAER_APOJ                | yes      |
|           | 858,9292   | 2      | 16          | 19        | DALSSVQESQVAQQAR_APOC3          | yes      |
|           | 413,2345   | 2      | 17          | 20        | FLLYNR_APOM                     | yes      |
|           | 801,4303   | 2      | 20          | 23        | VSALLTPAEQTGTWK_APOB            | yes      |
|           |            |        |             |           |                                 |          |
| PRM set 2 | Mass [m/z] | CS [z] | Start [min] | End [min] | SEQUENCE_APOLIPOPROTEIN         |          |
|           | 496,7213   | 2      | 6           | 12        | TDASDVKP[C]_APOH                | yes      |
|           | 405,8787   | 3      | 8           | 11        | ATEHLSTLSEK_APOA1               | yes      |
|           | 408,55     | 3      | 8           | 11        | <b>ATEHLSTLSEK[label]_APOA1</b> | no       |
|           | 521,7618   | 2      | 9           | 12        | GTYSTTVTGR_apo(a)               | yes      |
|           | 526,77     | 2      | 9           | 12        | <b>GTYSTTVTGR[label]_apo(a)</b> | yes      |
|           | 436,2534   | 3      | 9,5         | 12,5      | VLNQELR_APOD                    | yes      |
|           | 477,7337   | 2      | 10          | 15        | FMETVAEK_CLUS(APOJ)             | yes      |
|           | 815,8996   | 2      | 12          | 15        | VTEPISAESGEQVER_APOL1           | yes      |
|           | 471,2869   | 2      | 15          | 18        | EQLTPLIK_APOA2                  | yes      |
|           | 529,2981   | 3      | 15          | 18        | LKEEIGKELEELR_APOA4             | yes      |
|           | 509,2489   | 3      | 19          | 23        | AEPLAFTFSHDYK_APOB              | yes      |
|           | 981,4479   | 2      | 25          | 35        | TPEYYPNAGLIMNY[C]R_LPA          | no       |
|           |            |        |             |           |                                 |          |
| PRM set 3 | Mass [m/z] | CS [z] | Start [min] | End [min] | SEQUENCE_APOLIPOPROTEIN         |          |
|           | 473,248    | 2      | 7           | 10        | VAQELEEK_APOL1                  | yes      |
|           | 486,7535   | 2      | 8           | 11        | SPELQAEAK_APOA2                 | yes      |
|           | 405,8787   | 3      | 8           | 11        | ATEHLSTLSEK_APOA1               | yes      |
|           | 408,55     | 3      | 8           | 11        | <b>ATEHLSTLSEK[label]_APOA1</b> | no       |
|           | 519,2667   | 2      | 9           | 12        | TAAQNLYEK_APOC2                 | yes      |
|           | 386,2361   | 3      | 11          | 14        | SKEQLTPLIK_APOA2                | yes      |
|           | 810,9025   | 2      | 11          | 14        | VQAAVGTSAAPVPSDNH_APOE          | yes      |
|           | 526,7484   | 2      | 12          | 15        | EFGNTLEDK_APOC1                 | yes      |
|           | 415,9065   | 3      | 14          | 19        | TLLSNLEEAKK_CLUS(APOJ)          | no       |
|           | 553,3037   | 2      | 15          | 18        | LNILNNNYK_APOL1                 | yes      |
|           | 615,8381   | 2      | 16          | 19        | NILTSNNIDVK_APOD                | yes      |
|           | 449,7189   | 2      | 16          | 19        | DYWSTVK_APOC3                   | yes      |
|           | 496,9029   | 3      | 18          | 23        | MREWFSETFQK_APOC1               | yes      |
|           | 643,7986   | 2      | 20          | 24        | ESLSSYWESAK_APOC2               | yes      |
|           | 806,8963   | 2      | 30          | 35        | LLDNWDSVTSTFSK_APOA1            | yes      |

## **Supporting Information Legend**

**Supporting Information 1:** Targeted PRM mass spectrometry for the selected apolipoprotein peptides across four high-density lipoprotein (HDL) size fractions from large to small (alpha0, alpha1, alpha2, alpha3).

**Supporting Information 2:** Fluorescence-activated cell sorting of freshly isolated primary human valve cells: top panel: gating strategy; middle panel: CD68 and apoD expression; lower panel: alpha-smooth muscle actin ( $\alpha$ SMA) and apoJ expression

### **Supporting Information 3:**

A) Proteins with  $q \leq 0.1$  between NM, PM and PM + apoC-III increased in PM + apoC-III vs. NM (n=4 donors, day7 and day14 data).

B) Proteins with  $q \leq 0.1$  between NM, PM and PM + apoC-III increased in PM + apoC-III vs. PM (n=4 donors, day7 and day14 data).

### **Supporting Information 4: ApoC-III Functional Analyses**

A) The network of significantly enriched pathways (two-sided hypergeometric test p-value  $< 0.05$ ) in the differential proteome of apoC-III vs. NM based on unbiased community detection.

B) The network of significantly enriched pathways (two-sided hypergeometric test p-value  $< 0.05$ ) in the differential proteome of apoC-III vs. PM based on unbiased community detection.

### **Supporting Information 5: Interactome-based association analysis**

Network association of select apoC-III-associated pathways (middle column, derived from the data in Fig. 6A/B) with previously published inflammation and calcification modules (left) and calcific aortic valve disease (CAVD)-related pathways (right column; Experimental procedures for references). Edge thickness represents degree of association.

### **Supporting Information 6:**

A) Standard curve with three stable isotope labeled peptides fully labeled ( $^{13}\text{C}$ ,  $^{15}\text{N}$ ) at the Arg or Lys residues. Valve peptide samples were mixed with standards to a final concentration of 4 fmol apoA-I, 4 fmol apoE, and 0.4 fmol apo(a) on column. B) PRM inclusion list (peptides in bold represent the stable isotope labeled peptides). Start and end time represent the start and end time of the retention time window.

**Supporting Table 1:** CAVD tissue proteome (all data)

**Supporting Table 2:** Proteome data of apolipoprotein treated human VICs in cell culture

**Table S3:**

| Protein              | Supplier        | Host species                | Dilution |
|----------------------|-----------------|-----------------------------|----------|
| Lipoprotein (a)      | abcam (MA, USA) | Goat polyclonal             | 1:50     |
| Apolipoprotein A-I   | abcam (MA, USA) | Rabbit monoclonal [EP1368Y] | 1:100    |
| Apolipoprotein A-II  | abcam (MA, USA) | Mouse monoclonal            | 1:100    |
| Apolipoprotein A-IV  | abcam (MA, USA) | Mouse monoclonal [CL0468]   | 1:100    |
| Apolipoprotein B     | abcam (MA, USA) | Goat polyclonal             | 1:100    |
| Apolipoprotein C-III | abcam (MA, USA) | Rabbit monoclonal [EP1372Y] | 1:100    |
| Apolipoprotein D     | abcam (MA, USA) | Rabbit monoclonal [EPR2916] | 1:100    |
| Apolipoprotein E     | abcam (MA, USA) | Mouse monoclonal [E6D7]     | 1:100    |
| Apolipoprotein J     | abcam (MA, USA) | Rabbit monoclonal [EPR2911] | 1:400    |
| Apolipoprotein M     | abcam (MA, USA) | Goat polyclonal             | 1:100    |
